# Supplementary material
Source: publisher figshare collection journal article supplement (https://geolsoc.figshare.com/ndownloader/files/22411383)
Supplement: Supplementary file 1 [file 22411383]

## Sheet: Supplements U-Pb Data
Sample	Grain		207Pba	Ub	Pbb	Thb	206Pbcc	206Pbd	±2s	207Pbd	±2s	207Pbd	±2s	rhoe	206Pb	±2s	207Pb	±2s	207Pb	±2s	conc.
			(cps)	(ppm)	(ppm)	U	(%)	238U	(%)	235U	(%)	206Pb	(%)		238U	(Ma)	235U	(Ma)	206Pb	(Ma)	(%)
ML14-17 (Dobra Gneiss Type A)
ML 14-17	A74		202439	835.977	207.56	0.407539	0.872412	0.2306	2.29618	2.787	2.52673	0.08763	1.05446	0.908758	1337.86	27.8014	1351.96	19.0583	1374.33	20.2804	97.3461
ML 14-17	A57		265362	1092.41	271.504	0.3413	0.65224	0.2317	2.49317	2.769	2.70167	0.08666	1.04071	0.922828	1343.54	30.3076	1347.18	20.3562	1352.96	20.0754	99.3033
ML 14-17	A20		233134	995.177	243.719	0.711527	0.0529137	0.2325	2.29597	2.834	2.36565	0.08838	0.569932	0.970545	1347.68	27.9827	1364.47	17.9117	1390.85	10.9365	96.8959
ML 14-17	A63		269345	1150.75	284.501	0.511035	1.97815	0.2326	2.37058	2.796	3.18503	0.0872	2.12715	0.744288	1348.08	28.9017	1354.56	24.1053	1364.81	40.9652	98.7741
ML 14-17	A79		243887	1078.71	243.564	0.683589	0.0729903	0.234	2.92639	2.859	3.13953	0.0886	1.13704	0.932112	1355.55	35.8752	1371.13	23.8961	1395.49	21.8049	97.1376
ML 14-17	A38		297318	1254.82	307.156	0.456337	0	0.2343	2.41747	2.824	2.47314	0.08741	0.52179	0.97749	1357.05	29.6514	1361.92	18.7164	1369.58	10.0421	99.0849
ML 14-17	A52		210122	854.084	218.68	0.42906	0.133442	0.2343	2.30293	2.817	2.36907	0.08717	0.555895	0.972081	1357.21	28.2463	1359.95	17.9093	1364.25	10.7064	99.4835
ML 14-17	A27		143475	638.249	170.202	0.903279	2.40258	0.2351	2.94182	2.808	3.91245	0.08665	2.57933	0.751912	1361.01	36.1956	1357.75	29.7257	1352.62	49.7578	100.62
ML 14-17	A09		251462	1146.01	279.812	0.49003	0	0.2357	2.29448	2.831	2.35489	0.08713	0.529944	0.97435	1364.15	28.272	1363.84	17.8255	1363.35	10.2079	100.059
ML 14-17	A30		286543	1243.83	277.241	0.320382	0.094067	0.2357	2.28574	2.838	2.34209	0.08733	0.510661	0.975941	1364.38	28.1683	1365.7	17.7394	1367.78	9.83042	99.7516
ML 14-17	A25		233770	976.835	239.109	0.373426	1.8292	0.2359	2.3084	2.852	3.0373	0.08766	1.97394	0.760018	1365.49	28.4691	1369.24	23.0937	1375.08	37.9608	99.3029
ML 14-17	A14		303198	1299.52	310.325	0.360064	0	0.2361	2.32849	2.866	2.38812	0.08806	0.530351	0.975029	1366.29	28.7326	1373.11	18.1379	1383.71	10.187	98.7411
ML 14-17	A60		288317	1204.45	298.744	0.651281	b.d.	0.2369	2.30327	2.865	2.36711	0.08769	0.546011	0.973033	1370.77	28.5045	1372.72	17.9745	1375.75	10.4993	99.6379
ML 14-17	A31		262843	1113.69	253.306	0.621919	0.0777511	0.2381	2.27881	2.868	2.34114	0.08738	0.53664	0.973374	1376.57	28.3084	1373.6	17.781	1368.98	10.3288	100.555
ML 14-17	A47		176510	886.442	204.959	0.588214	0.128027	0.2387	2.28696	2.875	2.35272	0.08736	0.552355	0.97205	1379.76	28.469	1375.31	17.8803	1368.42	10.6321	100.829
ML 14-17	A78		290622	1212.3	300.288	0.527396	0.0137736	0.2391	2.37882	2.918	2.44478	0.08853	0.564057	0.97302	1381.96	29.6577	1386.68	18.659	1393.95	10.8191	99.1401
ML 14-17	A87		210332	1003.3	245.874	0.454522	b.d.	0.2407	2.36076	2.908	2.41866	0.0876	0.526066	0.97606	1390.57	29.5966	1383.9	18.4404	1373.64	10.1188	101.233
ML 14-17	A40		232623	941.966	235.388	0.5589	0.117587	0.2408	2.28512	2.929	2.35365	0.08823	0.563852	0.97088	1390.79	28.6501	1389.47	17.9744	1387.46	10.8249	100.24
ML 14-17	A84		265086	1084.61	239.121	0.412615	0	0.2408	2.33409	2.907	2.40852	0.08754	0.59411	0.969099	1391.02	29.2701	1383.72	18.3612	1372.47	11.4294	101.352
ML 14-17	A88		233064	1005.18	230.598	0.254196	0	0.2413	2.38058	2.907	2.42972	0.08739	0.486195	0.979775	1393.34	29.899	1383.82	18.5249	1369.16	9.35763	101.765
ML 14-17	A86		229849	1035.09	239.232	0.531386	1.01268	0.2414	2.41552	2.909	2.69164	0.0874	1.1875	0.897418	1393.84	30.3487	1384.21	20.5449	1369.4	22.8547	101.784
ML 14-17	A90		244304	1178.72	257.729	0.512954	1.92997	0.2418	2.30755	2.908	3.10621	0.08725	2.07937	0.742882	1395.85	29.0265	1384.1	23.7457	1366.04	40.0382	102.182
ML 14-17	A55		214289	928.936	222.147	0.938313	1.05715	0.2438	2.27819	2.943	2.64379	0.08755	1.34146	0.861711	1406.21	28.8471	1392.93	20.236	1372.66	25.8061	102.444
ML 14-17	A21		183875	968.637	233.292	0.686673	0.30181	0.2447	2.2811	2.952	2.36006	0.08748	0.605373	0.966542	1411.22	28.9764	1395.31	18.0593	1371.07	11.6483	102.928
ML 14-17	A18		220263	1197.21	266.215	0.645477	0.157273	0.2448	2.27047	2.943	2.34315	0.0872	0.579083	0.96898	1411.47	28.8456	1393.04	17.9151	1364.92	11.152	103.41
ML 14-17	A65		235807	1028.93	233.391	0.597847	b.d.	0.2449	2.35557	2.978	2.87225	0.08819	1.6435	0.820114	1411.99	29.9393	1401.9	22.0701	1386.57	31.5559	101.834
ML 14-17	A54		307807	1526.34	274.4	0.299919	0.0561984	0.1808	2.42818	2.135	2.48264	0.08567	0.517179	0.978061	1071.19	24.009	1160.32	17.3151	1330.77	10.0073	80.4942
ML 14-17	A77		203151	985.955	204.903	0.726791	0.0315672	0.1922	2.71751	2.284	2.77588	0.08621	0.566293	0.97897	1133.19	28.3017	1207.51	19.7961	1342.97	10.939	84.3791
ML 14-17	A76		137124	637.109	137.856	0.570036	0.184665	0.2042	2.29326	2.429	2.39234	0.08627	0.681368	0.958583	1198	25.1203	1251.33	17.3555	1344.31	13.1595	89.1163
ML 14-17	A45		312913	1261.47	333.007	0.354769	b.d.	0.2078	2.34672	2.458	2.41062	0.08579	0.551357	0.973492	1217.02	26.0787	1259.76	17.5493	1333.53	10.6646	91.263
ML 14-17	A594		207054	954.933	211.55	0.364294	0.861584	0.2151	2.36809	2.544	3.12706	0.08577	2.04222	0.75729	1256	27.0818	1284.67	23.0517	1332.94	39.5046	94.2276
ML 14-17	A62		117469	589.337	139.68	0.60677	0.436071	0.2168	4.05917	2.618	4.12883	0.08761	0.755235	0.983128	1264.74	46.785	1305.83	30.7999	1373.99	14.5261	92.0486
ML 14-17	A593		302301	1258.83	309.378	0.373654	0	0.2168	2.36661	2.596	2.43444	0.08686	0.570663	0.972137	1264.87	27.2383	1299.61	18.0043	1357.45	11.0012	93.1802
ML 14-17	A89		188559	763.319	181.951	1.25726	0.570928	0.2193	2.39609	2.574	3.2954	0.08513	2.26239	0.727102	1278.16	27.8409	1293.29	24.3893	1318.48	43.8524	96.9422
ML 14-17	A588		278488	1239.18	341.434	1.01813	0.126607	0.2199	2.46298	2.658	2.52745	0.08765	0.567174	0.974496	1281.5	28.6876	1316.87	18.821	1374.92	10.9075	93.2058
ML 14-17	A56		241775	1008.67	247.379	0.309168	0.00270281	0.2212	2.33278	2.629	2.39905	0.0862	0.559974	0.972377	1288.14	27.2953	1308.73	17.8019	1342.65	10.8175	95.9405
ML 14-17	A585		215319	1008.94	244.591	0.437278	0.00419682	0.2215	2.31457	2.663	2.37742	0.08719	0.543053	0.973562	1289.82	27.1138	1318.19	17.7027	1364.62	10.4585	94.5191
ML 14-17	A581		262662	1216.71	293.979	0.491762	0.140032	0.2229	2.32497	2.678	2.66633	0.08712	1.3053	0.871976	1297.28	27.3784	1322.34	19.9059	1363.17	25.1435	95.1668
ML 14-17	A26		101312	452.775	111.935	0.845817	b.d.	0.223	2.43322	2.697	2.4992	0.08773	0.570485	0.973599	1297.61	28.6625	1327.67	18.6835	1376.5	10.9688	94.2688
ML 14-17	A19		289059	1416.43	315.013	0.577958	0.142607	0.2242	2.47074	2.662	2.76462	0.08613	1.24038	0.893701	1303.93	29.2336	1318.07	20.6144	1341.15	23.9664	97.2246
ML 14-17	A92		229318	943.548	236.867	0.344242	2.33409	0.2264	2.30818	2.729	3.39123	0.08744	2.48451	0.680631	1315.4	27.523	1336.37	25.5177	1370.14	47.8121	96.0047
ML 14-17	A16		198298	865.121	208.749	0.475465	0.0709635	0.2275	2.29587	2.73	2.37234	0.08705	0.597468	0.967767	1321.2	27.4851	1336.66	17.7852	1361.52	11.5115	97.0386
ML 14-17	A61		259222	1092.18	265.296	0.556871	0.0580725	0.2279	2.35119	2.719	2.6847	0.08652	1.29597	0.875773	1323.66	28.1961	1333.67	20.1283	1349.77	25.0104	98.0654
ML 14-17	A32		272956	1144.13	285.975	0.316229	0.0234494	0.23	2.30801	2.764	2.38161	0.08717	0.587485	0.969098	1334.28	27.8774	1345.81	17.9145	1364.19	11.3149	97.8075
ML 14-17	A07		226081	924.903	252.855	0.319772	0.585336	0.2672	2.40679	3.263	2.5859	0.08855	0.945641	0.930736	1526.67	32.8002	1472.21	20.2987	1394.54	18.1368	109.475
ML 14-17	A091		231141	866.216	251.883	0.540202	b.d.	0.2729	2.32694	3.3	2.81763	0.08771	1.58884	0.825849	1555.39	32.2381	1481.1	22.1975	1376.25	30.5499	113.016
ML 14-17	A66		241763	1020.55	321.866	0.592674	1.00659	0.3058	2.42114	3.686	3.18678	0.08744	2.07212	0.759745	1719.81	36.6515	1568.42	25.7778	1370.23	39.8755	125.513
ML 14-17	A75		181594	956.901	176.29	0.865642	0.310168	0.1674	4.24069	2.029	4.32883	0.08788	0.869067	0.97964	997.911	39.3252	1125.15	29.8764	1379.79	16.7021	72.3234
ML 14-17	A17		293680	1411.84	300.532	2.26063	0.962614	0.1885	2.37848	2.285	2.638	0.08791	1.14101	0.901621	1113.2	24.3632	1207.6	18.8044	1380.58	21.926	80.6331
ML 14-17	A591		236863	1084.94	233.402	0.574055	0.075639	0.2034	2.53799	2.482	2.59927	0.08852	0.561084	0.976424	1193.43	27.7102	1266.85	18.9897	1393.75	10.7624	85.6273
ML 14-17	A596		177628	1021.91	209.725	0.250578	0.0307375	0.205	2.25886	2.499	2.35002	0.08843	0.648217	0.961205	1201.91	24.8164	1271.73	17.1867	1391.78	12.4371	86.3576
ML 14-17	A597		307733	1630.94	349.202	0.862942	0.99716	0.207	2.44308	2.573	5.67531	0.09015	5.12255	0.430475	1212.86	27.0672	1293.03	42.3704	1428.75	97.7881	84.8895
ML 14-17	A51		166521	759.727	171.075	0.630317	0	0.2086	2.32157	2.559	2.41885	0.08899	0.6791	0.95978	1221.11	25.8776	1289	17.815	1403.96	13.0078	86.9758
ML 14-17	A587		174975	806.205	208.868	1.54768	0.142353	0.2155	2.30863	2.639	2.86241	0.08883	1.69223	0.806533	1257.88	26.4363	1311.59	21.2995	1400.52	32.4291	89.8148
ML 14-17	A06		220299	965.228	230.276	0.841401	0	0.2202	2.56008	2.693	2.68385	0.08869	0.805651	0.953881	1283.15	29.8559	1326.58	20.0696	1397.42	15.4458	91.8227
ML 14-17	A10		103576	336.814	87.2204	0.467335	3.49435	0.2202	2.81252	2.698	4.63192	0.08886	3.68027	0.607204	1282.92	32.8021	1327.9	34.9066	1401.2	70.5206	91.5587
ML 14-17	A13		172011	793.777	204.071	0.686126	0.0289145	0.2223	2.63755	2.725	2.75069	0.08888	0.780758	0.958871	1294.11	30.9994	1335.16	20.6394	1401.61	14.9599	92.3304
ML 14-17	A580		347675	1589.69	370.847	0.298134	1.72785	0.2236	2.3125	2.762	3.01743	0.08957	1.93835	0.766381	1301	27.3017	1345.23	22.7463	1416.31	37.0655	91.8582
ML 14-17	A586		347261	1354.81	306.988	0.280671	0.254178	0.2309	2.40946	2.87	2.48201	0.09013	0.59571	0.97077	1339.35	29.2053	1374.01	18.8636	1428.31	11.3726	93.7714
ML 14-17	A579		365719	1614.23	393.063	0.653656	0	0.2319	2.33634	2.886	2.43377	0.09023	0.681732	0.959967	1344.64	28.418	1378.15	18.52	1430.45	13.0111	94.0017
ML 14-17	A15		259949	1087.31	268.809	0.372634	0.0149536	0.2377	3.30646	2.93	3.38752	0.08937	0.736632	0.97607	1374.92	41.0708	1389.57	25.9724	1412.14	14.0941	97.3647
ML 14-17	A46		120391	513.222	128.942	0.348494	0.0149536	0.2377	3.30646	2.929	3.38752	0.08937	0.736632	0.97607	1374.9	41.0703	1389.56	25.9723	1412.14	14.0941	97.3633
ML 14-17	A49		207574	876.606	217.685	0.399181	1.29663	0.2418	2.29989	2.971	2.72949	0.08914	1.4699	0.842609	1395.8	28.929	1400.26	20.9503	1407.06	28.1433	99.1993
ML 14-17	A584		219528	1225.77	283.748	0.538166	b.d.	0.2464	2.64659	3.028	2.6994	0.08912	0.531367	0.980434	1420.11	33.8211	1414.8	20.8172	1406.82	10.1741	100.944
ML 14-17	A22		192898	1056.66	252.495	0.568499	0	0.2466	3.19576	3.18	3.43141	0.09353	1.24966	0.931328	1421.03	40.8853	1452.42	26.8595	1498.65	23.6315	94.821
ML 14-17	A80		200240	849.747	210.798	0.412028	1.05491	0.247	2.34208	3.132	2.67498	0.09196	1.29236	0.875549	1422.97	29.9748	1440.52	20.7991	1466.52	24.5447	97.0306
ML 14-17	A42		256276	1051.92	265.713	0.511246	b.d.	0.2572	2.35878	3.278	2.41058	0.09244	0.497061	0.97851	1475.49	31.1831	1475.9	18.9308	1476.5	9.42758	99.932
ML 14-17	A24		197027	472.185	155.108	0.539974	1.34921	0.2945	2.28686	4.244	2.58858	0.1045	1.21286	0.883441	1664.14	33.6288	1682.6	21.4979	1705.69	22.3266	97.5642
ML 14-17	A592		426826	973.97	312.68	0.414087	1.44544	0.3042	2.34012	4.619	3.63034	0.1101	2.77546	0.644602	1711.95	35.2798	1752.64	30.7625	1801.51	50.4851	95.0285
ML 14-17	A29		178731	355.255	132.226	1.50262	0.969237	0.3404	2.74435	5.564	2.88004	0.1185	0.873583	0.952888	1888.77	45.0884	1910.55	25.0959	1934.28	15.6381	97.6469
ML 14-17	A82		181323	1938.11	136.367	0.4902	0.56028	0.06162	5.09059	0.7625	5.95306	0.08975	3.08622	0.855122	385.448	19.0747	575.443	26.4929	1420.22	58.9837	27.1401
ML 14-17	A44		318421	1543.6	138.292	0.71003	0.311715	0.07066	19.9055	0.9333	21.8442	0.09579	8.99648	0.911252	440.16	85.2531	669.348	113.149	1543.56	169.114	28.5158
ML 14-17	A595		155005	1005.75	151.212	1.47766	0.0836976	0.1394	3.97707	1.724	4.02431	0.08969	0.614803	0.988261	841.518	31.4519	1017.64	26.1983	1418.84	11.7523	59.3103
ML 14-17	A48		164382	767.682	173.429	4.28957	0	0.1943	2.53607	2.436	2.61215	0.09093	0.625856	0.970873	1144.61	26.652	1253.26	18.9801	1445.04	11.921	79.2096
ML 14-17	A85		236699	1463.13	269.764	0.438993	0.0258501	0.1858	3.67157	2.11	3.76356	0.08238	0.827006	0.975558	1098.38	37.1862	1152.03	26.2631	1254.45	16.1761	87.5586
ML 14-17	A53		228316	1056.13	224.218	0.699742	0.775496	0.1965	2.61595	2.289	3.24811	0.08448	1.92536	0.805377	1156.57	27.7562	1208.94	23.217	1303.72	37.3973	88.7131
ML 14-17	A583		277975	1367.59	301.333	0.976838	0.424757	0.1988	2.37644	2.322	2.46997	0.08471	0.673296	0.96213	1168.95	25.4565	1219.1	17.6837	1308.99	13.0681	89.3015
ML 14-17	A58		323964	1264.45	301.626	0.484106	0.567089	0.2067	2.31302	2.339	2.47265	0.08204	0.874024	0.935443	1211.43	25.5959	1224.07	17.7406	1246.42	17.1153	97.1924
ML 14-17	A11		275426	1179.81	275.147	0.49984	0	0.2305	3.66567	2.683	3.74268	0.08442	0.755352	0.979422	1337.16	44.4188	1323.84	28.0692	1302.34	14.6744	102.673
ML 14-17	A08		8115.36	194.265	12.5303	0.293949	0.354235	0.06242	2.53234	0.4774	3.23905	0.05547	2.01958	0.781816	390.323	9.59814	396.306	10.6839	431.355	45.0037	90.4875
ML 14-17	A28		307127	1584.84	300.892	0.265936	0	0.1755	3.69961	2.82	17.3384	0.1165	16.9391	0.213377	1042.32	35.7044	1360.77	139.062	1903.6	304.334	54.7553
ML 14-17	A590		314807	1726.25	371.264	0.446099	0.110051	0.1788	4.35053	5.409	52.9681	0.2194	52.7892	0.0821349	1060.17	42.6708	1886.22	601.566	2976.64	850.267	35.6163
ML 14-17	A59		302014	1357.28	287.881	0.401416	1.32426	0.209	2.39739	2.179	4.77398	0.07562	4.12837	0.502178	1223.27	26.7675	1174.29	33.7807	1085.09	82.7713	112.734
ML 15-4 (Dobra Gneiss Type B)
ML 15-4	A414		22501.9	236.988	23.8012	0.292336	1.98592	0.09258	3.16247	0.7638	14.4613	0.05984	14.1113	0.218685	570.772	17.2976	576.21	65.6659	597.715	305.638	95.4923
ML 15-4	A422		12954	202.661	19.0604	0.380583	0.482895	0.09367	2.95155	0.7785	12.1656	0.06028	11.8022	0.242613	577.187	16.3162	584.628	55.5647	613.632	254.945	94.0608
ML 15-4	A349		22802	188.727	18.5289	0.522164	2.01866	0.09004	2.37332	0.7456	10.4807	0.06006	10.2084	0.226447	555.778	12.6502	565.687	46.5049	605.734	220.809	91.7527
ML 15-4	A400		27375.2	444.939	41.885	0.381692	0.318495	0.09262	2.42774	0.7588	10.3977	0.05942	10.1103	0.233487	570.989	13.2796	573.342	46.6038	582.682	219.535	97.9932
ML 15-4	A415		26689.2	410.748	39.2582	0.434832	1.69251	0.09073	2.50423	0.7355	10.2887	0.05879	9.97932	0.243396	559.859	13.4426	559.784	45.2689	559.48	217.54	100.068
ML 15-4	A366		39027.4	572.143	56.3774	0.528493	0.728228	0.09366	2.54652	0.7623	9.59991	0.05903	9.256	0.265265	577.16	14.0741	575.353	43.0655	568.221	201.474	101.573
ML 15-4	A468		52237.6	870.238	84.3956	0.756375	4.72729	0.09357	2.68704	0.7738	9.38991	0.05998	8.99723	0.286162	576.613	14.8381	581.936	42.4682	602.767	194.707	95.661
ML 15-4	A427		44854.6	677.292	59.6535	0.192009	0.989203	0.09163	2.52647	0.7484	8.92244	0.05924	8.55727	0.283159	565.158	13.6851	567.29	39.5395	575.846	186.026	98.144
ML 15-4	A417		31425.5	496.213	58.2817	1.4171	1.13239	0.09174	2.4212	0.7449	8.27451	0.05889	7.91235	0.292609	565.821	13.129	565.255	36.5159	562.981	172.38	100.504
ML 15-4	A458		29000.1	304.475	29.9245	0.266102	2.73481	0.09457	2.2774	0.7815	7.89464	0.05994	7.55902	0.288475	582.495	12.6966	586.359	35.7888	601.347	163.622	96.8652
ML 15-4	A352		39848.1	337.149	31.2235	0.153903	1.29614	0.09242	2.47305	0.7514	7.56095	0.05897	7.14506	0.327082	569.853	13.5019	569.052	33.4844	565.852	155.588	100.707
ML 15-4	A447		47666.1	635.762	61.1848	0.361444	1.76439	0.09442	2.71732	0.7737	7.23347	0.05943	6.70367	0.37566	581.625	15.1304	581.865	32.5538	582.799	145.56	99.7986
ML 15-4	A445		56399.3	838.246	84.0541	0.683025	0.721262	0.09076	2.7156	0.7451	7.17626	0.05954	6.6426	0.378415	560.04	14.5831	565.377	31.5982	586.907	144.134	95.4224
ML 15-4	A388		27110.8	399.315	36.3555	0.315717	1.65081	0.08985	2.53071	0.7335	7.17058	0.05921	6.70915	0.35293	554.658	13.4639	558.594	31.2844	574.665	145.879	96.5186
ML 15-4	A365		41787.7	632.551	58.834	0.260553	1.49439	0.09362	2.28378	0.763	6.3911	0.05911	5.96913	0.357337	576.891	12.6149	575.764	28.4819	571.32	129.862	100.975
ML 15-4	A382		53330.3	821.477	77.2999	0.282928	0.446782	0.09462	2.37417	0.7855	6.21518	0.0602	5.74385	0.381996	582.828	13.2438	588.605	28.1495	610.947	124.131	95.3974
ML 15-4	A433		26364.7	595.518	60.4452	0.49711	2.55911	0.09376	3.46718	0.7766	5.83352	0.06007	4.69134	0.594355	577.734	19.1883	583.529	26.2276	606.145	101.467	95.3129
ML 15-4	A399		57501	859.991	80.0103	0.31473	0.478855	0.09319	2.33873	0.7607	5.81427	0.0592	5.32317	0.402239	574.395	12.8653	574.411	25.8324	574.472	115.747	99.9867
ML 15-4	A404		18201.2	313.888	30.1002	0.518847	3.33671	0.09113	2.31057	0.7483	5.75582	0.05955	5.27169	0.401432	562.215	12.452	567.231	25.3278	587.395	114.378	95.7133
ML 15-4	A462		112052	746.67	73.9149	0.197484	4.75306	0.09107	2.63202	0.7574	5.34861	0.06032	4.65618	0.492095	561.89	14.1784	572.515	23.68	614.926	100.559	91.3752
ML 15-4	A457		25460.5	404.25	36.4157	0.0938895	0.683543	0.09513	2.52059	0.7706	3.34765	0.05875	2.20303	0.752945	585.795	14.13	580.114	14.9027	557.927	48.0367	104.995
ML 15-4	A351		65656.5	472.638	42.3884	0.14542	0.590204	0.09338	2.32781	0.7747	2.94811	0.06017	1.80906	0.789592	575.515	12.829	582.438	13.1517	609.523	39.1052	94.4205
ML 15-4	A434		49962.3	1013.22	76.9712	0.114508	1.02677	0.07974	2.46228	0.6325	3.80166	0.05753	2.89652	0.647685	494.554	11.7326	497.627	15.0665	511.788	63.6557	96.6327
ML 15-4	A464		52783.5	840.004	73.3596	0.455149	2.09892	0.08214	2.37705	0.6591	11.4045	0.0582	11.154	0.208432	508.857	11.6412	514.094	47.0797	537.446	244.057	94.6806
ML 15-4	A444		35679.9	531.641	43.8726	0.266817	1.04278	0.08257	2.60049	0.658	5.27243	0.0578	4.5865	0.493225	511.474	12.7996	513.42	21.4727	522.094	100.618	97.966
ML 15-4	A435		63177.6	1082.61	88.7576	0.237945	1.22604	0.08396	2.55078	0.6803	4.93483	0.05876	4.22447	0.516892	519.742	12.7497	526.943	20.4919	558.264	92.1085	93.0997
ML 15-4	A393		33034	619.626	73.793	1.638	0.432222	0.08413	2.6395	0.6819	10.9319	0.05879	10.6084	0.24145	520.744	13.2181	527.944	46.0327	559.199	231.265	93.1231
ML 15-4	A431		49095.8	745.164	66.002	0.374503	2.22765	0.08437	2.51509	0.6736	6.02075	0.0579	5.47027	0.417736	522.152	12.6271	522.899	24.9085	526.165	119.923	99.2373
ML 15-4	A453		64575.5	994.084	81.5606	0.169855	1.63395	0.08444	2.59598	0.676	4.49184	0.05806	3.66572	0.577932	522.552	13.0433	524.339	18.5644	532.125	80.2812	98.201
ML 15-4	A451		20389.5	309.781	26.0025	0.280645	0.981615	0.08522	2.57004	0.6828	5.84365	0.05811	5.24816	0.439799	527.226	13.0237	528.486	24.3663	533.933	114.902	98.7439
ML 15-4	A372		18617.1	273.26	23.4703	0.270057	0.969957	0.08608	2.29221	0.6896	4.81685	0.0581	4.23649	0.475872	532.318	11.7223	532.549	20.1606	533.543	92.7589	99.7703
ML 15-4	A460		17199.6	261.596	22.3686	0.245436	0.4398	0.08663	2.70797	0.6996	14.7794	0.05857	14.5292	0.183227	535.578	13.9322	538.566	63.7317	551.236	317.165	97.1596
ML 15-4	A348		43330.1	371.917	33.3368	0.331868	1.72327	0.08679	2.39057	0.7085	8.21038	0.05921	7.85464	0.291164	536.506	12.3181	543.843	35.1731	574.714	170.784	93.3517
ML 15-4	A358		58331.2	815.066	69.8924	0.36582	1.77158	0.08688	3.41123	0.7049	7.33611	0.05884	6.49477	0.464992	537.087	17.6028	541.736	31.2759	561.35	141.535	95.6777
ML 15-4	A449		32404.7	502.331	46.2159	0.485743	1.36973	0.08735	2.31647	0.7119	8.95057	0.05911	8.64562	0.258806	539.818	12.0066	545.883	38.5157	571.285	188.091	94.4918
ML 15-4	A356		34799.1	136.775	13.5489	0.477609	5.83537	0.08747	2.72108	0.7309	14.3046	0.0606	14.0434	0.190224	540.542	14.1242	557.059	63.2611	625.14	302.776	86.4674
ML 15-4	A355		29600.6	180.297	16.4297	0.560431	0.883074	0.0875	2.40581	0.7093	7.24689	0.05879	6.8359	0.331979	540.747	12.4908	544.32	31.0028	559.31	149.021	96.6811
ML 15-4	A466		68325.8	924.008	79.9331	0.231634	1.07722	0.08751	2.5654	0.7053	4.60436	0.05846	3.82346	0.557167	540.792	13.3212	541.96	19.523	546.877	83.5261	98.8873
ML 15-4	A413		74428.7	749.267	68.7938	0.318271	3.27901	0.08753	2.44012	0.7072	6.79342	0.05859	6.34006	0.359189	540.942	12.6735	543.066	28.9834	551.989	138.383	97.9987
ML 15-4	A452		5808.59	99.1362	9.27948	0.546244	b.d.	0.08794	2.37218	0.7193	2.92452	0.05933	1.71043	0.811135	543.344	12.3727	550.28	12.5005	579.091	37.1626	93.8271
ML 15-4	A339		21115	280.214	24.8429	0.242274	2.09987	0.08829	2.42149	0.7119	5.58284	0.05848	5.03036	0.433737	545.417	12.6764	545.878	23.8517	547.803	109.874	99.5646
ML 15-4	A381		33268.8	652.998	114.421	5.83519	0.966865	0.08856	2.40074	0.7271	8.30231	0.05954	7.94763	0.289166	547.012	12.6029	554.834	36.1243	587.064	172.447	93.1775
ML 15-4	A347		48825.3	521.782	50.2677	0.567718	0.580282	0.08893	2.31646	0.7331	6.23865	0.05979	5.79265	0.371307	549.197	12.2066	558.345	27.1544	595.817	125.504	92.1754
ML 15-4	A402		23163.9	367.131	32.9067	0.309625	0.326289	0.08899	2.6868	0.7627	10.1369	0.06216	9.77436	0.265051	549.574	14.1696	575.582	45.5431	679.639	208.842	80.8627
ML 15-4	A456		88358.1	1203.15	104.126	0.103481	1.38375	0.08917	2.48359	0.7208	3.58986	0.05863	2.59209	0.691833	550.631	13.121	551.157	15.3847	553.332	56.564	99.512
ML 15-4	A459		17139.3	283.195	25.5466	0.334363	0.518863	0.08952	2.59239	0.7289	14.0256	0.05905	13.784	0.184832	552.683	13.7453	555.881	61.8875	568.999	299.995	97.1326
ML 15-4	A423		62369.1	906.22	81.3194	0.317634	0.830669	0.08956	2.34987	0.7243	3.75651	0.05866	2.93079	0.625545	552.912	12.4631	553.208	16.15	554.427	63.9431	99.7267
ML 15-4	A426		70770.4	938.903	91.7928	0.386041	2.24892	0.08973	2.70291	0.7337	6.11079	0.05931	5.48051	0.442318	553.932	14.363	558.751	26.6051	578.431	119.088	95.7646
ML 15-4	A380		46047.4	736.364	64.9696	0.247448	0.396111	0.08982	2.32144	0.7274	6.85182	0.05873	6.44658	0.338807	554.498	12.3461	555.002	29.7265	557.07	140.587	99.5382
ML 15-4	A427		44854.6	677.292	59.6535	0.192009	0.989203	0.09163	2.52647	0.7484	8.92244	0.05924	8.55727	0.283159	565.158	13.6851	567.29	39.5395	575.846	186.026	98.144
ML 15-4	A379		76666.4	1088.45	95.8113	0.194262	1.02646	0.09011	2.49541	0.7308	4.76273	0.05882	4.05666	0.523946	556.177	13.3108	557.033	20.6275	560.535	88.4157	99.2225
ML 15-4	A405		45068.1	638.72	62.8099	0.445809	1.00209	0.09638	2.82974	0.7879	7.45001	0.05929	6.89167	0.379831	593.169	16.056	589.968	33.8951	577.672	149.771	102.683
ML 15-4	A341		34810.1	525.752	51.5339	0.326887	0.543824	0.09636	2.56204	0.8424	9.09465	0.0634	8.72632	0.281709	593.033	14.5322	620.45	43.1252	721.771	185.166	82.1637
ML 15-4	A346		54185	510.482	54.5263	0.762874	0.435113	0.09657	2.45565	0.802	5.83195	0.06024	5.28974	0.421069	594.252	13.9554	597.96	26.7032	612.051	114.296	97.0918
ML 15-4	A396		24568.3	384.805	38.8782	0.410407	3.39072	0.09674	2.29324	0.8127	5.7259	0.06093	5.24662	0.400503	595.248	13.0524	603.965	26.4066	636.818	112.898	93.4721
ML 15-4	A344		70357.4	785.077	75.4802	0.194416	0.640818	0.09826	2.58802	0.8193	4.94018	0.06047	4.20803	0.523872	604.215	14.944	607.678	22.8454	620.61	90.7938	97.3582
ML 15-4	A465		146485	1789.01	170.866	0.143814	1.06874	0.09827	3.41006	0.8111	4.39572	0.05986	2.77378	0.775768	604.253	19.6992	603.074	20.1885	598.643	60.0683	100.937
ML 15-4	A395		78228.9	1094.67	105.192	0.192931	0.565645	0.09846	2.49027	0.835	4.23958	0.0615	3.43112	0.587387	605.407	14.4061	616.367	19.7796	656.833	73.5866	92.1706
ML 15-4	A353		17455.1	126.752	12.5796	0.246667	1.62943	0.09938	2.87325	0.8198	6.53897	0.05983	5.87389	0.439404	610.759	16.7647	607.954	30.3605	597.514	127.228	102.217
ML 15-4	A412		61582.1	758.434	84.909	0.938193	0.748308	0.09954	2.69963	0.8383	8.2895	0.06108	7.83759	0.325669	611.717	15.774	618.227	39.1284	642.134	168.502	95.2632
ML 15-4	A471		47830.6	818.952	80.0469	0.181679	2.96114	0.09957	2.78022	0.8151	5.13696	0.05937	4.31958	0.541218	611.906	16.2503	605.306	23.6975	580.674	93.8267	105.379
ML 15-4	A392		34927.3	620.479	77.4809	1.56244	0.315538	0.1032	2.4458	0.8629	6.26895	0.06066	5.77215	0.390145	633.012	14.7633	631.72	29.9217	627.1	124.407	100.943
ML 15-4	A370		32308.1	530.734	55.3207	0.163704	4.42233	0.1048	2.52149	0.9214	6.05135	0.06377	5.501	0.416681	642.369	15.4348	663.086	29.901	734.176	116.492	87.4952
ML 15-4	A374		58186.3	747.296	54.7885	0.917842	5.37823	0.06421	4.17644	0.4843	11.1307	0.0547	10.3174	0.375219	401.158	16.264	400.994	37.5604	400.049	231.171	100.277
ML 15-4	A469		57677.9	941.174	64.0063	0.206702	2.36246	0.06883	2.48017	0.5393	4.1633	0.05682	3.34392	0.595723	429.089	10.3039	437.935	14.919	484.711	73.8302	88.5247
ML 15-4	A425		81737.9	1389.34	155.117	2.60696	2.41479	0.06936	3.11141	0.5605	8.62503	0.0586	8.04427	0.360743	432.307	13.0229	451.826	31.952	552.409	175.568	78.2585
ML 15-4	A337		82917.5	1409.8	210.849	5.62327	3.09956	0.07512	2.68012	0.5854	8.35431	0.05652	7.91274	0.320807	466.947	12.0836	467.917	31.8152	472.678	175.067	98.7875
ML 15-4	A389		50488.9	680.57	54.2378	0.298911	2.70991	0.07528	2.46578	0.6023	7.04903	0.05802	6.6037	0.349804	467.908	11.1384	478.671	27.2666	530.572	144.663	88.1893
ML 15-4	A371		43621.4	633.712	49.2705	0.269121	5.7444	0.07557	2.76959	0.5989	7.47416	0.05748	6.94208	0.370556	469.619	12.5563	476.549	28.8328	510.044	152.609	92.0742
ML 15-4	A421		15312.4	252.376	20.6886	0.553006	1.93116	0.07566	3.25941	0.6001	12.584	0.05753	12.1546	0.259012	470.142	14.7954	477.303	49.0891	511.863	267.113	91.8491
ML 15-4	A401		132993	928.147	85.196	0.234678	11.7744	0.076	2.99342	0.5956	8.75364	0.05684	8.22591	0.341964	472.221	13.6447	474.448	33.7326	485.232	181.603	97.3184
ML 15-4	A432		28165.1	419.448	39.5251	0.652444	1.59756	0.07662	2.6959	0.6005	12.7215	0.05685	12.4326	0.211917	475.921	12.3801	477.579	49.6618	485.549	274.458	98.0171
ML 15-4	A454		28582.3	400.734	30.9554	0.151074	2.47245	0.07663	2.33979	0.6031	6.25576	0.05708	5.80171	0.374021	475.994	10.745	479.199	24.1824	494.564	127.879	96.2452
ML 15-4	A424		30664.1	516.825	40.5348	0.271247	1.55676	0.07759	2.75904	0.6116	6.86947	0.05717	6.29106	0.401637	481.693	12.8184	484.538	26.8204	498.019	138.583	96.7219
ML 15-4	A463		21490.2	343.482	30.0771	0.540119	2.791	0.07788	3.67194	0.6227	13.211	0.05799	12.6904	0.277946	483.469	17.1261	491.563	52.829	529.454	278.054	91.3147
ML 15-4	A420		85970.4	947.035	102.226	0.104808	1.25669	0.1127	2.28641	0.9829	3.48077	0.06324	2.62451	0.65687	688.529	14.9484	695.096	17.6722	716.394	55.7392	96.1104
ML 15-4	A340		51870	235.29	32.8407	0.369583	10.1152	0.1131	2.84024	1.011	7.68699	0.06483	7.14303	0.369486	690.788	18.6322	709.417	40.0195	768.839	150.418	89.8482
ML 15-4	A407		46641.5	374.118	58.5001	0.341571	1.7786	0.1542	2.29062	1.488	6.38483	0.07001	5.95979	0.35876	924.266	19.7539	925.518	39.5334	928.502	122.372	99.5437
ML 15-4	A429		47854.7	292.999	47.1216	0.429059	2.44626	0.1548	2.54594	1.505	6.50905	0.07051	5.99049	0.391138	927.676	22.035	932.325	40.5027	943.331	122.72	98.3405
ML 15-4	A394		49449	280.148	52.1039	0.538084	1.68948	0.1746	2.33248	1.766	7.29678	0.07333	6.91394	0.319659	1037.59	22.3931	1032.92	48.4379	1023.05	139.92	101.421
ML 15-4	A342		25950.9	158.847	32.565	0.623594	1.05525	0.1861	2.49025	1.954	10.069	0.07618	9.75623	0.247318	1100.03	25.233	1099.91	69.9896	1099.68	195.182	100.031
ML 15-4	A437		23509.7	114.817	29.8153	0.897913	b.d.	0.2232	2.59116	2.628	9.91069	0.0854	9.56596	0.261451	1298.78	30.5522	1308.54	75.6439	1324.57	185.261	98.0527
ML 15-4	A428		50124.7	755.991	63.8009	0.932707	1.34344	0.0661	3.67002	0.5617	10.6294	0.06163	9.97576	0.345269	412.588	14.6844	452.626	39.5803	661.46	213.785	62.3753
ML 15-4	A446		45571.3	699.343	55.5079	0.54909	0.9621	0.07231	2.88672	0.603	6.71149	0.06048	6.05896	0.430116	450.083	12.5617	479.149	25.9647	620.771	130.727	72.5038
ML 15-4	A361		51764.4	1469.41	270.322	9.02054	0.927718	0.07415	3.03716	0.6102	4.46779	0.05968	3.27671	0.67979	461.119	13.5299	483.687	17.3388	592.105	71.0376	77.878
ML 15-4	A345		49871.4	476.477	41.1101	0.758721	1.31556	0.07959	3.31433	0.6719	5.11682	0.06123	3.89835	0.647732	493.669	15.7703	521.855	21.097	647.187	83.7409	76.2792
ML 15-4	A410		43605.2	492.939	39.3419	0.421486	5.00511	0.07584	2.95159	0.7013	10.9898	0.06706	10.586	0.268575	471.233	13.4267	539.543	47.0713	839.764	220.408	56.115
ML 15-4	A354		11514.4	77.7196	6.84171	0.329266	0.399835	0.08612	2.32153	0.7163	2.81354	0.06033	1.5895	0.825127	532.531	11.8769	548.484	11.9936	615.312	34.326	86.5465
ML 15-4	A408		20717.5	317.538	28.9672	0.371999	b.d.	0.08988	2.27714	0.7423	2.46179	0.0599	0.935434	0.924994	554.827	12.1171	563.772	10.7063	600.033	20.2528	92.4661
ML 15-4	A364		56074.9	659.232	87.5856	3.0729	2.33022	0.08322	2.54788	0.751	8.93335	0.06545	8.5623	0.28521	515.299	12.6305	568.78	39.6679	788.786	179.728	65.3282
ML 15-4	A467		19347.4	308.688	28.9011	0.374304	b.d.	0.0921	2.28399	0.7648	2.46438	0.06022	0.925485	0.926804	567.949	12.4289	576.761	10.9021	611.63	19.9985	92.8583
ML 15-4	A461		24616.8	395.293	34.7018	0.191856	1.45896	0.08979	2.28793	0.7654	3.42563	0.06183	2.54957	0.667886	554.287	12.1632	577.141	15.194	668.167	54.5779	82.9563
ML 15-4	A375		19182.6	291.658	26.7469	0.318315	0.145977	0.09084	2.31258	0.7656	2.57063	0.06113	1.12254	0.899616	560.503	12.4265	577.262	11.3822	643.786	24.1271	87.0635
ML 15-4	A414		21861.7	236.92	23.1023	0.291702	1.32757	0.08968	2.94445	0.7672	3.70014	0.06205	2.24082	0.795766	553.617	15.6396	578.135	16.4426	675.693	47.9091	81.9332
ML 15-4	A406		23375.4	442.124	41.5009	0.515622	b.d.	0.08941	2.33607	0.7777	2.49101	0.06309	0.864837	0.937798	552.023	12.3708	584.182	11.1261	711.241	18.3828	77.614
ML 15-4	A360		59934.6	1047.85	140.753	3.75293	1.51569	0.09014	4.11931	0.7882	4.56509	0.06342	1.96757	0.902351	556.36	21.9946	590.146	20.6397	722.303	41.7468	77.0259
ML 15-4	A398		40811.6	666.504	60.9359	0.187427	b.d.	0.09431	2.31342	0.8118	2.46905	0.06243	0.86274	0.936966	580.976	12.8654	603.457	11.2956	688.831	18.4057	84.3423
ML 15-4	A430		23786.8	385.656	35.889	0.1592	0.941811	0.097	2.3899	0.8232	2.92205	0.06155	1.6813	0.817885	596.814	13.6373	609.829	13.4855	658.48	36.0487	90.635
ML 15-4	A391		20954.5	289.934	29.0955	0.7112	b.d.	0.0897	2.60884	0.8275	11.6154	0.06691	11.3186	0.224603	553.746	13.8582	612.227	54.8599	834.972	235.839	66.3191
ML 15-4	A390		28543.2	392.504	40.8716	0.570619	2.02849	0.09627	2.70068	0.8432	3.8292	0.06352	2.71461	0.705285	592.51	15.3066	620.888	17.9439	725.731	57.565	81.6431
ML 15-4	A363		62386.5	1019.46	111.178	0.903401	b.d.	0.09969	3.08127	0.8558	3.22289	0.06226	0.944872	0.956059	612.609	18.0322	627.837	15.2044	683.084	20.1769	89.6828
ML 15-4	A343		26479.3	223.301	24.1214	0.40914	3.50577	0.09842	2.31677	0.8711	4.00225	0.06419	3.26353	0.578867	605.163	13.3962	636.163	19.0978	747.895	68.9564	80.9155
ML 15-4	A350		33947.7	273.836	27.5346	0.3302	3.41904	0.09928	2.80048	0.891	4.30629	0.06509	3.27131	0.650322	610.188	16.325	646.894	20.8141	777.197	68.7946	78.5113
ML 15-4	A448		23033.1	346.276	35.8944	0.388488	b.d.	0.1025	2.42356	0.8986	2.68436	0.06359	1.15419	0.902843	628.944	14.5392	650.983	12.9831	728.159	24.4657	86.3744
ML 15-4	A411		54338.9	817.025	106.891	1.1095	0.0352667	0.1212	4.03614	1.084	4.15126	0.06488	0.970856	0.972268	737.461	28.1871	745.718	22.168	770.583	20.4385	95.7017
ML 15-4	A438		45186.3	340.648	43.2129	0.491884	0.565716	0.1119	3.09662	1.154	8.62798	0.07475	8.05314	0.358904	683.954	20.126	778.981	48.0484	1061.89	162.022	64.409
ML 15-4	A338		71803.4	694.131	66.9411	0.219299	2.73779	0.08948	2.40768	1.177	3.97964	0.09537	3.16869	0.605	552.449	12.7598	789.755	22.0825	1535.48	59.6282	35.9789
ML 15-4	A403		169610	521.223	87.3153	0.152257	12.6683	0.1187	2.61669	1.291	7.50588	0.07889	7.035	0.348619	723.258	17.9273	841.929	43.8882	1169.29	139.306	61.8546
ML 15-4	A367		249902	418.951	101.114	1.08234	21.5338	0.1075	12.0025	1.332	13.7397	0.08983	6.68733	0.873561	658.44	75.5682	859.759	82.9875	1422.01	127.777	46.3034
ML 15-4	A357		74030.9	54.5323	11.9442	0.335035	22.8645	0.1274	3.3127	1.585	7.60178	0.09027	6.84201	0.435779	772.922	24.1744	964.517	48.4716	1431.24	130.568	54.0037
ML 15-4	A409		260717	319.006	85.1631	0.616061	11.0359	0.221	2.7295	3.321	5.52571	0.109	4.80451	0.493963	1287.08	31.9249	1486.09	44.0661	1782.89	87.594	72.1908
ML 15-4	A470		496177	1219.48	331.445	0.196985	1.98794	0.2666	2.8354	3.832	3.41215	0.1042	1.89823	0.830971	1523.5	38.5876	1599.44	27.8544	1700.96	34.9639	89.5673
ML 15-4	A472		106216	1406.69	72.6904	0.272668	3.85474	0.04724	2.86754	0.3432	7.96369	0.05268	7.42951	0.360077	297.576	8.34455	299.579	20.8732	315.214	168.98	94.4044
ML 15-4	A450		67480.2	1205.33	130.478	4.60427	4.21595	0.04867	4.25978	0.3541	9.09761	0.05277	8.03871	0.468231	306.343	12.7569	307.831	24.4505	319.119	182.709	95.9966
ML 15-4	A378		60468.5	1519.92	218.175	7.08045	0.705269	0.0508	2.45052	0.3683	7.02297	0.05258	6.58157	0.348929	319.429	7.64143	318.389	19.3778	310.787	149.813	102.781
ML 15-4	A368		66010.1	1096.14	65.7571	0.444036	4.43159	0.05552	2.94783	0.408	7.44904	0.0533	6.84094	0.395732	348.3	10.0026	347.409	22.156	341.452	154.869	102.006
ML 15-4	A455		40850.2	654.676	37.8622	0.303484	2.4646	0.05625	2.3821	0.4211	9.0328	0.0543	8.71304	0.263717	352.765	8.18263	356.838	27.5481	383.414	195.794	92.0064
ML 15-4	A418		50115.3	1302.38	154.396	4.30411	0.461698	0.05963	2.35487	0.4461	7.53586	0.05426	7.15847	0.312488	373.36	8.54804	374.551	23.8836	381.921	160.903	97.7587
ML17-39 (Dobra Gneiss Type B)
ML 17-39	A542		80004.5	1113.73	98.8217	0.100816	1.05139	0.09238	2.28667	0.7618	3.50091	0.05981	2.65094	0.653165	569.619	12.4785	575.053	15.4884	596.587	57.4279	95.4796
ML 17-39	A558		33558.6	558.425	54.4387	0.505803	3.00079	0.09314	2.33841	0.7771	5.20726	0.06051	4.65268	0.449067	574.091	12.857	583.802	23.3874	621.753	100.369	92.3342
ML 17-39	A484		5237.4	83.9013	8.12627	0.414506	b.d.	0.09422	2.30762	0.7864	3.01528	0.06053	1.94082	0.765308	580.469	12.8224	589.121	13.568	622.6	41.862	93.233
ML 17-39	A563		39719.3	531.866	54.8447	0.682262	2.64552	0.09424	2.7012	0.7804	13.3661	0.06006	13.0903	0.202093	580.579	15.0146	585.738	61.3047	605.785	283.142	95.8391
ML 17-39	A510		82536.2	903.63	88.8723	0.339509	3.10447	0.09471	2.38967	0.7681	7.94413	0.05882	7.57619	0.30081	583.321	13.3412	578.661	35.6603	560.408	165.128	104.089
ML 17-39	A487		102210	800.224	82.9462	0.252015	6.17331	0.09264	2.517	0.7613	8.46461	0.0596	8.08173	0.297356	571.119	13.7714	574.759	37.8466	589.177	175.294	96.935
ML 17-39	A485		27824.3	372.395	35.4384	0.281123	1.88539	0.09393	2.48234	0.7735	5.27271	0.05973	4.65182	0.470791	578.709	13.7543	581.794	23.6238	593.857	100.82	97.4491
ML 17-39	A508		26635.2	453.782	47.1436	0.657785	4.10328	0.09597	2.40444	0.8017	6.77678	0.06059	6.33588	0.354806	590.74	13.5869	597.772	31.089	624.54	136.615	94.5881
ML 17-39	A476		55318.8	404.184	42.7762	0.1657	6.1884	0.09709	2.4266	0.8049	6.2062	0.06013	5.71214	0.390996	597.315	13.8581	599.615	28.4996	608.323	123.5	98.1903
ML 17-39	A478		57178.7	757.295	73.9635	0.202107	1.1347	0.09731	2.30211	0.8073	4.34684	0.06017	3.68719	0.529604	598.634	13.1741	600.95	19.9098	609.698	79.7011	98.1852
ML 17-39	A530		71260.6	735.38	72.8141	0.181111	3.27955	0.09759	2.52916	0.8011	4.94534	0.05953	4.24968	0.511423	600.285	14.5131	597.442	22.5836	586.665	92.2153	102.322
ML 17-39	A491		40124.1	396.413	41.4917	0.485275	4.25414	0.0978	2.44952	0.8177	6.56153	0.06064	6.08717	0.373315	601.529	14.0834	606.786	30.4234	626.465	131.211	96.0196
ML 17-39	A523		49512.3	649.676	60.6977	0.0849673	1.14883	0.09792	2.26461	0.8091	3.32355	0.05993	2.4326	0.681382	602.18	13.0326	601.976	15.2067	601.21	52.6572	100.161
ML 17-39	A513		41363.3	438.087	44.2553	0.309398	2.41774	0.09966	2.31869	0.828	4.57295	0.06025	3.94151	0.507046	612.437	13.5611	612.485	21.2524	612.662	85.1563	99.9633
ML 17-39	A537		37391.8	486.427	48.0784	0.196442	1.77404	0.09971	2.29095	0.8233	5.97623	0.05988	5.51968	0.383343	612.708	13.4043	609.872	27.7764	599.35	119.519	102.229
ML 17-39	A528		93766.4	881.286	91.9081	0.183217	5.28465	0.1	2.9436	0.8416	6.47421	0.06101	5.76633	0.454666	614.687	17.2812	620.031	30.4954	639.588	124.024	96.1067
ML 17-39	A568		50181.7	637.683	64.3599	0.232783	2.24232	0.102	2.35299	0.855	4.40932	0.06078	3.72901	0.533641	626.194	14.0566	627.374	20.8481	631.63	80.3107	99.1395
ML 17-39	A543		82229.2	1167.81	88.2481	0.0246808	3.0696	0.07722	2.53678	0.6159	4.4779	0.05785	3.69003	0.566512	479.486	11.7328	487.276	17.4797	524.078	80.9244	91.4913
ML 17-39	A562		100230	1023.65	88.3813	0.794324	7.47944	0.07742	3.28605	0.6157	10.1011	0.05767	9.55162	0.325317	480.728	15.2404	487.144	39.8564	517.437	209.71	92.9056
ML 17-39	A571		66554.6	813.406	67.4989	0.324625	4.55856	0.07836	2.39904	0.6277	6.50683	0.05809	6.04842	0.368696	486.355	11.2484	494.643	25.803	533.198	132.439	91.2147
ML 17-39	A509		75082.5	948.949	76.5887	0.304411	3.13551	0.07843	2.36786	0.6223	7.10587	0.05755	6.69975	0.333225	486.739	11.1105	491.282	28.0608	512.52	147.22	94.9697
ML 17-39	A506		63724	684.966	59.841	0.262254	4.92486	0.07921	2.75386	0.6761	9.18589	0.0619	8.76338	0.299792	491.382	13.0423	524.387	38.3369	670.809	187.513	73.2521
ML 17-39	A482		112458	1030.91	92.1452	0.108381	5.59611	0.08433	2.66303	0.6777	5.90283	0.05829	5.26799	0.451145	521.93	13.3652	525.403	24.5051	540.524	115.207	96.56
ML 17-39	A512		82687.3	808.747	73.5731	0.35428	4.30551	0.0811	2.88725	0.6388	9.06773	0.05713	8.59579	0.318409	502.674	13.9772	501.569	36.5395	496.532	189.401	101.237
ML 17-39	A566		72747.1	1000.12	83.1586	0.0871439	3.65034	0.08423	2.67564	0.6889	4.94569	0.05932	4.15942	0.541005	521.303	13.4131	532.163	20.6939	579.002	90.3733	90.0346
ML 17-39	A545		172870	1226.22	120.365	0.188796	8.73583	0.08526	2.48719	0.6847	7.26286	0.05825	6.82371	0.342453	527.44	12.6084	529.632	30.4241	539.087	149.266	97.8395
ML 17-39	A504		69640.1	462.038	51.9124	0.599329	9.87709	0.08625	2.71537	0.6945	10.5554	0.05839	10.2002	0.257248	533.337	13.9142	535.476	44.9044	544.598	222.917	97.9323
ML 17-39	A567		65486.8	989.881	82.9932	0.0954422	2.01704	0.087	2.60546	0.7048	4.20665	0.05876	3.30265	0.619367	537.752	13.4565	541.661	17.8142	558.145	72.011	96.3463
ML 17-39	A486		103045	1034.77	97.152	0.165823	5.12734	0.08734	2.40478	0.7167	8.53807	0.05952	8.19241	0.281654	539.781	12.464	548.724	36.8549	586.031	177.789	92.1079
ML 17-39	A544		14645.1	246.963	23.8884	0.63137	4.09488	0.08913	2.33591	0.7397	6.83802	0.06019	6.42667	0.341606	550.369	12.3344	562.208	29.9585	610.414	138.9	90.1632
ML 17-39	A539		80783.9	1091.75	96.3505	0.101232	1.93996	0.09055	2.28419	0.7312	4.51958	0.05857	3.89988	0.505399	558.777	12.2376	557.266	19.5704	551.097	85.1346	101.394
ML 17-39	A547		53793.1	790.648	68.8859	0.130958	1.17372	0.09018	2.27645	0.7323	4.02844	0.0589	3.32356	0.565096	556.576	12.1501	557.902	17.4404	563.318	72.4037	98.8032
ML 17-39	A477		109805	1264.82	114.59	0.126095	2.63837	0.08982	2.30421	0.7383	4.64112	0.05962	4.02872	0.496477	554.472	12.2538	561.412	20.2151	589.638	87.3769	94.036
ML 17-39	A519		39068.3	347.639	33.5745	0.203001	3.12739	0.09048	2.45616	0.7505	6.33564	0.06016	5.84017	0.387674	558.375	13.1508	568.517	27.9626	609.295	126.248	91.6428
ML 17-39	A561		15766.2	256.422	28.0364	1.10107	6.27138	0.09076	2.38186	0.7589	9.9015	0.06065	9.61074	0.240555	560.016	12.7885	573.4	44.3338	626.814	207.15	89.3432
ML 17-39	A522		33435.6	848.705	50.1632	0.355111	1.7604	0.05982	2.77159	0.4488	6.37182	0.05441	5.73745	0.434976	374.554	10.0932	376.413	20.2411	387.864	128.828	96.5683
ML 17-39	A564		105826	816.963	65.3597	0.381048	13.4454	0.06461	3.55373	0.5485	11.9965	0.06157	11.4581	0.29623	403.586	13.9177	444.005	44.0898	659.263	245.641	61.2178
ML 17-39	A569		97930.6	955.783	74.6697	0.101292	7.95224	0.07075	2.63497	0.5554	6.81047	0.05694	6.28009	0.3869	440.66	11.2331	448.558	24.9994	489.263	138.549	90.066
ML 17-39	A525		72696.3	550.4	53.5797	0.100904	20.2123	0.07111	7.73595	0.6341	22.8965	0.06468	21.5501	0.337866	442.814	33.1911	498.646	94.4769	763.849	454.167	57.9715
ML 17-39	A493		162886	1025.56	95.0533	0.303754	11.2024	0.07332	3.34685	0.5701	9.63847	0.05639	9.03873	0.347239	456.126	14.7552	458.07	36.1716	467.835	200.147	97.4971
ML 17-39	A502		87425.6	815.567	86.5171	0.0985789	2.12412	0.1083	2.32698	0.9467	3.89585	0.06342	3.12455	0.597297	662.64	14.6702	676.381	19.4219	722.402	66.2941	91.7274
ML 17-39	A557		151506	948.961	114.893	0.215782	6.9656	0.1096	2.58512	0.943	7.24268	0.0624	6.76561	0.356929	670.414	16.4813	674.435	36.3335	687.887	144.36	97.4599
ML 17-39	A499		72038.9	440.814	54.8761	0.115527	6.00006	0.1153	2.45581	1.004	5.7392	0.06313	5.18724	0.427901	703.607	16.3905	705.75	29.6209	712.576	110.235	98.7414
ML 17-39	A576		41260.2	492.623	58.7581	0.150187	1.96628	0.1217	2.43833	1.08	6.39412	0.06441	5.91095	0.38134	740.059	17.0704	743.772	34.2877	754.966	124.752	98.0254
ML 17-39	A480		93711.4	726.194	97.9184	0.199323	5.76025	0.1258	2.65612	1.123	9.7334	0.06476	9.36398	0.272887	763.829	19.1608	764.55	53.6793	766.661	197.256	99.6306
ML 17-39	A503		52305.4	498.786	62.9711	0.129426	1.82957	0.1288	2.29841	1.158	4.50966	0.06519	3.88	0.509663	781.104	16.9301	780.976	24.8728	780.608	81.5503	100.064
ML 17-39	A533		134962	566.942	87.0888	0.223735	7.4674	0.1326	2.47064	1.24	5.75409	0.06782	5.19668	0.429371	802.921	18.6786	819.062	32.8741	863.154	107.799	93.0218
ML 17-39	A575		65175.9	709.093	94.213	0.223282	3.14835	0.1336	2.69895	1.227	5.83095	0.0666	5.16871	0.462867	808.649	20.5444	813.128	33.1604	825.405	107.861	97.9699
ML 17-39	A524		135065	628.932	98.5298	0.293063	5.91547	0.1339	2.59023	1.229	10.4216	0.06656	10.0946	0.248544	810.36	19.7547	814.056	60.0974	824.172	210.697	98.3242
ML 17-39	A507		158626	572.746	103.165	0.483555	13.6071	0.1388	2.95899	1.286	9.33765	0.06719	8.85641	0.316889	837.816	23.2895	839.398	54.784	843.587	184.284	99.3159
ML 17-39	A560		70379.4	476.051	74.7547	0.388568	4.05463	0.1507	2.5056	1.509	8.94511	0.07262	8.58702	0.280108	904.853	21.1875	933.995	56.1494	1003.4	174.298	90.1787
ML 17-39	A514		159092	810.329	140.336	0.527262	3.56041	0.1509	2.54463	1.47	12.1791	0.07065	11.9103	0.208934	906.09	21.5455	918.141	76.4023	947.216	243.845	95.6582
ML 17-39	A548		88095.4	476.525	72.5394	0.160788	2.61633	0.1525	2.49707	1.595	3.61912	0.07584	2.61968	0.689964	915.165	21.3396	968.314	22.8427	1090.98	52.4769	83.8846
ML 17-39	A489		26542.5	155.517	24.2298	0.232514	1.25085	0.1537	2.87182	1.502	10.3927	0.07091	9.98809	0.27633	921.499	24.7067	931.335	65.418	954.686	204.255	96.5239
ML 17-39	A511		105464	526.801	96.5571	0.796309	2.47725	0.1624	3.08124	1.622	13.4899	0.07243	13.1333	0.22841	970.076	27.81	978.653	88.4731	997.95	266.799	97.2068
ML 17-39	A473		254758	1062	198.428	0.45675	3.84487	0.1648	2.52796	1.759	4.68846	0.07738	3.94855	0.539187	983.627	23.1029	1030.37	30.8121	1130.99	78.6291	86.9702
ML 17-39	A540		104217	364.404	67.2077	0.329716	5.36047	0.1656	3.20739	1.731	6.15931	0.07582	5.2583	0.520739	987.663	29.438	1020.1	40.4343	1090.38	105.343	90.5799
ML 17-39	A520		172321	1106.45	189.783	0.628734	1.93458	0.1686	3.37576	1.723	4.65715	0.07414	3.20831	0.724856	1004.12	31.4653	1017.1	30.3708	1045.15	64.7111	96.0739
ML 17-39	A521		155246	827.633	149.035	0.462408	2.24569	0.173	2.56019	1.763	6.85508	0.07387	6.35905	0.373474	1028.87	24.3927	1031.81	45.4105	1038.05	128.399	99.1162
ML 17-39	A490		285536	832.278	225.498	1.67486	7.10076	0.1859	3.79216	1.989	7.08368	0.0776	5.98314	0.535338	1098.96	38.4299	1111.67	49.0248	1136.62	119.046	96.6868
ML 17-39	A559		59450	291.826	58.1543	0.340842	3.16604	0.1899	2.51687	1.977	5.64334	0.07553	5.05101	0.445989	1120.69	25.9429	1107.83	38.7874	1082.65	101.307	103.514
ML 17-39	A534		58032.9	297.501	55.9643	0.0641334	0.97876	0.1947	2.34055	2.155	2.86601	0.08026	1.65404	0.816657	1146.92	24.6389	1166.63	20.0741	1203.4	32.591	95.3069
ML 17-39	A531		78392.5	202.825	66.0677	0.751128	0.852929	0.284	2.47676	4.028	4.76852	0.1029	4.07486	0.519398	1611.45	35.4113	1639.8	39.5486	1676.34	75.2905	96.1292
ML 17-39	A492		144415	770.568	58.7317	0.319121	17.2301	0.04686	6.3194	0.4074	10.7186	0.06306	8.65756	0.589574	295.222	18.2613	347.015	32.0046	710.127	184.057	41.5731
ML 17-39	A501		31676.6	750.674	38.8279	0.21868	0.612936	0.05046	2.86265	0.3834	3.17564	0.0551	1.37474	0.901441	317.37	8.8713	329.538	8.97605	416.377	30.7145	76.2219
ML 17-39	A488		73867.7	1290.27	80.3375	0.224447	4.01294	0.05768	3.93485	0.5549	9.7794	0.06977	8.95285	0.402361	361.508	13.8481	448.205	36.0702	921.665	184.023	39.2233
ML 17-39	A515		67651.2	582.947	41.6584	0.191382	3.09093	0.06309	5.29003	0.5483	8.37087	0.06302	6.48745	0.631957	394.416	20.2711	443.864	30.5539	709.037	137.946	55.627
ML 17-39	A541		82068.5	921.298	69.0969	0.087937	5.55615	0.07263	2.71708	0.6113	6.33827	0.06104	5.72636	0.428678	451.99	11.8712	484.365	24.714	640.632	123.143	70.5537
ML 17-39	A527		89659.5	728.133	67.6019	0.198032	7.74843	0.08107	2.68393	0.7172	5.52949	0.06416	4.83443	0.485386	502.504	12.9877	549.017	23.7247	747.016	102.163	67.2681
ML 17-39	A483		78167.7	976.823	91.7122	0.556288	1.57398	0.08651	2.59662	0.7348	3.69468	0.06161	2.62835	0.702799	534.834	13.3409	559.394	16.0163	660.614	56.3346	80.9602
ML 17-39	A481		34484.4	556.677	49.0141	0.201655	b.d.	0.09004	2.31617	0.7552	2.47615	0.06083	0.87558	0.935394	555.79	12.3455	571.236	10.8759	633.193	18.8522	87.7757
ML 17-39	A572		14008.1	216.53	21.4464	0.678818	b.d.	0.09078	2.33587	0.7929	2.83406	0.06334	1.60487	0.824213	560.158	12.5444	592.8	12.8064	719.796	34.0652	77.8217
ML 17-39	A517		17357.1	274.975	24.6885	0.240701	b.d.	0.09118	2.3019	0.7561	2.51094	0.06014	1.00305	0.916746	562.526	12.4118	571.772	11.0373	608.702	21.6852	92.414
ML 17-39	A516		15602.4	240.571	21.7856	0.242017	0.202019	0.09186	2.30668	0.7668	2.60241	0.06054	1.2049	0.886362	566.548	12.5228	577.931	11.5337	622.938	25.9871	90.9477
ML 17-39	A570		67955.4	1059.49	93.1204	0.153288	0.53448	0.09225	2.27051	0.8115	2.56209	0.0638	1.18707	0.886191	568.85	12.3742	603.295	11.7214	734.932	25.1349	77.4016
ML 17-39	A565		15127.4	199.366	19.413	0.426372	0.39585	0.09242	2.34999	0.7874	2.76289	0.06179	1.45297	0.850555	569.815	12.8286	589.673	12.434	666.862	31.1099	85.4471
ML 17-39	A505		34279.6	545.014	50.8478	0.310751	b.d.	0.09334	2.32648	0.7769	2.48358	0.06036	0.869277	0.936746	575.252	12.8161	583.692	11.0858	616.665	18.7682	93.2844
ML 17-39	A535		31286.6	507.705	49.1234	0.0591988	4.35281	0.09605	6.78612	1.338	14.6803	0.101	13.0177	0.46226	591.22	38.4506	862.216	89.0932	1642.68	241.563	35.9911
ML 17-39	A526		51485	502.83	53.3252	0.212874	5.45399	0.0966	2.69718	1.125	10.9789	0.08449	10.6425	0.245669	594.453	15.3346	765.526	60.8112	1303.85	206.71	45.5922
ML 17-39	A532		156885	642.051	99.0999	0.197103	7.83081	0.1244	2.43485	1.269	5.38953	0.07393	4.80817	0.451775	756.105	17.3948	831.774	31.0727	1039.69	97.06	72.7241
ML 17-39	A479		103351	558.27	70.3059	0.084436	5.78619	0.1154	2.81549	1.103	5.12549	0.06935	4.28295	0.549312	703.803	18.7995	754.87	27.6715	909.306	88.2041	77.4
ML 17-39	A556		90264	712.65	80.8161	0.100976	0.734845	0.1177	2.28498	1.23	2.66939	0.07573	1.38005	0.855992	717.588	15.5358	814.123	15.0586	1088.01	27.6571	65.9541
ML 17-39	A573		206552	727.034	102.292	0.341607	7.12073	0.12	3.15637	1.224	5.4205	0.074	4.40671	0.582303	730.408	21.8332	811.628	30.7528	1041.39	88.9331	70.1375
ML 17-39	A574		111600	804.387	106.078	0.167496	4.92051	0.1221	2.37246	2.049	4.61783	0.1218	3.96178	0.513762	742.504	16.6605	1132.12	32.012	1982.2	70.5224	37.4587
ML 17-39	A555		157825	831.063	110.323	0.180889	1.73945	0.1236	2.89223	2.072	4.13017	0.1216	2.94844	0.700268	751.037	20.5368	1139.62	28.6875	1980.18	52.4966	37.9276
ML 17-39	A577		59718.9	543.351	77.9037	0.112127	1.08727	0.1493	2.30993	1.519	2.72606	0.07378	1.44763	0.847349	897.161	19.3754	938.109	16.8306	1035.55	29.2409	86.6366
ML 17-39	A475		109074	521.996	113.144	0.610137	1.78179	0.1942	2.4411	2.207	4.14956	0.08243	3.35557	0.588281	1144.03	25.6402	1183.28	29.4181	1255.76	65.6218	91.1025
ML 17-39	A518		77076.7	307.197	71.7009	0.668202	1.72884	0.1976	2.44722	2.313	2.98761	0.08489	1.71374	0.819124	1162.49	26.0838	1216.32	21.4035	1313.14	33.2428	88.5273
ML 17-39	A538		103791	275.729	100.14	1.26739	0.505383	0.2833	2.34122	4.153	3.47244	0.1063	2.56447	0.67423	1607.71	33.3999	1664.73	28.8209	1737.41	47.0196	92.5352
ML 17-39	A546		118796	223.24	92.585	0.741432	b.d.	0.3531	2.28357	6.622	2.37784	0.136	0.662865	0.960358	1949.62	38.534	2062.33	21.1963	2176.92	11.5421	89.5586
ML 17-39	A529		45413.6	186.466	48.9187	0.375237	20.4846	0.1445	9.87184	8.217	14.0705	0.4123	10.0262	0.701599	870.211	80.8649	2255.17	136.094	3954.64	150.319	22.0048
ML17-38 (Metasediment)
ML 17-38	A51		43858.4	441.955	52.7568	0.0746643	1.49661	0.1214	2.49095	1.194	17.1141	0.07134	16.9319	0.14555	738.677	17.4085	797.956	99.2801	967.296	345.584	76.3651
ML 17-38	A93		25924.2	110.489	23.2731	0.660542	3.35603	0.1747	2.75951	2.002	13.2014	0.0831	12.9097	0.209032	1038.15	26.5146	1116.25	93.578	1271.65	251.893	81.6383
ML 17-38	A38		46187.2	189.294	35.3162	0.122836	7.38953	0.1768	2.483	1.814	6.42463	0.07443	5.92541	0.386482	1049.48	24.093	1050.66	42.9514	1053.12	119.371	99.6543
ML 17-38	A64		18828.6	118.026	22.4686	0.315314	0.404278	0.1842	3.06964	2.043	6.7707	0.08044	6.03487	0.453372	1089.91	30.8546	1130	47.2389	1207.86	118.833	90.2342
ML 17-38	A44		36866.5	176.963	42.6448	1.03813	6.82942	0.197	2.4108	2.262	8.03102	0.08327	7.66063	0.300186	1158.99	25.6241	1200.37	58.1785	1275.64	149.389	90.8556
ML 17-38	A10		30702.5	197.101	41.212	0.374156	3.65697	0.2011	2.32581	2.213	4.96653	0.07979	4.38828	0.468298	1181.38	25.155	1185.03	35.3398	1191.7	86.6127	99.1339
ML 17-38	A73		66489.1	313.811	85.5321	1.62642	8.01064	0.2018	2.44844	2.357	9.0896	0.08474	8.75362	0.269367	1184.75	26.5531	1229.79	66.9646	1309.64	169.884	90.4644
ML 17-38	A88		28187	138.869	32.1682	0.709874	b.d.	0.2055	2.5355	2.353	13.8223	0.08304	13.5877	0.183436	1204.63	27.9199	1228.33	103.595	1270.18	265.178	94.8398
ML 17-38	A30		62355.8	276.034	68.9642	0.938762	5.97859	0.2065	2.34642	2.418	6.94291	0.0849	6.53439	0.337959	1210.23	25.9428	1247.84	51.1357	1313.36	126.749	92.1475
ML 17-38	A61		261154	178.016	89.4596	1.34771	32.7375	0.2067	4.26173	2.159	14.0104	0.07574	13.3465	0.304183	1211.46	47.2407	1167.98	102.203	1088.25	267.464	111.322
ML 17-38	A91		45105.9	0	0	0.808175	4.69484	0.2085	2.30396	2.443	5.65787	0.08498	5.16752	0.407213	1220.83	25.6757	1255.36	41.6041	1315.05	100.211	92.8356
ML 17-38	A111		18179.6	88.8876	21.5513	0.834675	4.9648	0.2105	2.31754	2.446	5.98966	0.08427	5.52313	0.386924	1231.66	26.0356	1256.29	44.1145	1298.74	107.354	94.8348
ML 17-38	A50		24273.4	116.477	29.6535	1.10228	6.0484	0.2108	2.35888	2.436	7.15598	0.08381	6.75601	0.329637	1233.18	26.5306	1253.32	52.867	1288.09	131.516	95.7374
ML 17-38	A22		27863.4	128.216	32.1675	0.944955	5.70784	0.2121	2.35025	2.489	6.70645	0.08509	6.28114	0.350447	1240.12	26.5687	1268.76	49.7778	1317.64	121.763	94.1169
ML 17-38	A94		18832.2	86.0752	20.9547	0.755029	4.6822	0.2142	2.3205	2.506	5.7255	0.08486	5.23418	0.405292	1251.1	26.4425	1273.79	42.4284	1312.28	101.544	95.3382
ML 17-38	A19		37344.1	169.788	44.1094	1.0746	6.11021	0.2145	2.34385	2.506	7.11762	0.08474	6.72063	0.329303	1252.71	26.7403	1273.78	53.0181	1309.52	130.432	95.6618
ML 17-38	A65		15157.7	70.9537	16.3702	0.513341	3.29028	0.2147	2.31375	2.485	4.46223	0.08393	3.81551	0.518519	1254.02	26.4212	1267.71	32.8334	1291.02	74.2435	97.1337
ML 17-38	A14		33480.6	145.304	37.3969	1.00204	4.73551	0.2148	2.32392	2.548	5.65184	0.08602	5.15196	0.411179	1254.39	26.5447	1285.83	42.0723	1338.74	99.5787	93.6994
ML 17-38	A16		53753.3	236.941	61.8963	1.06498	6.4746	0.2158	2.38397	2.545	7.44295	0.08554	7.05082	0.320299	1259.58	27.3343	1285.05	55.7601	1327.88	136.488	94.8567
ML 17-38	A62		75975.5	110.351	35.7379	0.37157	14.3445	0.2158	3.58536	2.54	15.1925	0.08536	14.7633	0.235996	1259.56	41.1527	1283.45	117.189	1323.66	285.953	95.1571
ML 17-38	A92		25010.7	119.241	29.8118	0.880605	5.28485	0.2159	2.32599	2.518	6.27872	0.0846	5.83199	0.370456	1259.95	26.6754	1277.23	46.688	1306.42	113.234	96.4429
ML 17-38	A52		29882.4	135.721	33.8123	0.80671	4.91715	0.2173	2.30926	2.555	5.88256	0.08527	5.41034	0.39256	1267.61	26.6291	1287.82	43.8618	1321.69	104.823	95.9089
ML 17-38	A57		22906.8	104.094	26.429	0.855162	5.57196	0.2185	2.34476	2.561	6.62123	0.08499	6.19216	0.354128	1273.94	27.1616	1289.44	49.5375	1315.34	120.077	96.8523
ML 17-38	A28		21038	95.0697	24.0721	0.826881	5.60184	0.2189	2.33878	2.525	6.71688	0.08367	6.29656	0.348195	1276.07	27.1332	1279.36	50.0704	1284.9	122.627	99.3125
ML 17-38	A18		65565	298.807	71.9902	0.606152	3.70199	0.2208	2.31276	2.572	4.71385	0.08448	4.1075	0.490631	1286.09	27.0216	1292.71	35.0625	1303.72	79.7821	98.6483
ML 17-38	A56		17753.7	78.1605	19.5184	0.686164	5.13685	0.2211	2.33068	2.66	6.21913	0.08725	5.7659	0.37476	1287.51	27.2585	1317.3	46.9618	1366.11	111.021	94.2462
ML 17-38	A112		30643.7	147.74	37.6413	0.799778	6.01121	0.2215	2.37948	2.646	7.03296	0.08664	6.6182	0.338333	1289.83	27.8759	1313.55	53.1949	1352.47	127.674	95.3683
ML 17-38	A49		32733.4	92.1464	25.3176	0.664845	5.26005	0.2233	2.8934	2.78	8.37468	0.09029	7.85898	0.345493	1299.12	34.1335	1350.05	64.5449	1431.69	149.966	90.7406
ML 17-38	A72		15505.2	69.7029	17.228	0.61763	4.49355	0.2245	2.30464	2.65	5.55768	0.08561	5.05731	0.414678	1305.6	27.2959	1314.6	41.8197	1329.29	97.8784	98.2182
ML 17-38	A58		26035.7	106.085	26.5697	0.700169	4.64457	0.226	2.33672	2.627	5.74196	0.08431	5.24498	0.406955	1313.39	27.8258	1308.2	43.131	1299.69	101.934	101.055
ML 17-38	A46		29676.2	128.083	32.9861	0.75836	b.d.	0.2265	2.51144	2.713	3.13968	0.08686	1.88421	0.799903	1316.07	29.9662	1331.9	23.5641	1357.44	36.3238	96.9519
ML 17-38	A107		22188.5	101.389	26.1563	0.720716	0.345454	0.2298	2.3788	2.718	2.79247	0.08577	1.4626	0.851861	1333.45	28.7183	1333.26	20.9416	1332.95	28.2925	100.038
ML 17-38	A78		35927.3	112.339	33.596	1.01131	3.65525	0.2341	2.68802	2.907	17.5116	0.09006	17.304	0.1535	1355.99	32.9549	1383.74	141.749	1426.82	330.416	95.0357
ML 17-38	A117		105847	100.773	43.915	0.862448	20.6027	0.2399	3.53889	2.999	8.69628	0.09068	7.94364	0.406943	1386.02	44.2871	1407.41	68.479	1439.95	151.411	96.2548
ML 17-38	A121		119656	110.983	55.3617	1.15179	18.7877	0.2748	3.40362	4.383	16.614	0.1157	16.2617	0.204864	1565.33	47.4769	1709.06	147.578	1890.03	292.638	82.82
ML 17-38	A15		142303	163.308	77.429	1.46226	14.6245	0.2848	2.6915	4.245	16.5508	0.1081	16.3304	0.162621	1615.28	38.5714	1682.69	146.025	1767.78	298.288	91.3737
ML 17-38	A99		151856	110.653	59.5156	0.823124	8.9633	0.286	2.79071	4.201	10.4512	0.1066	10.0717	0.267023	1621.29	40.1289	1674.28	89.5527	1741.35	184.573	93.1051
ML 17-38	A09		26247.6	73.7057	23.6418	0.497357	2.85929	0.2971	2.29138	4.278	3.52461	0.1044	2.67815	0.650107	1676.91	33.9223	1689.05	29.4295	1704.15	49.3097	98.4017
ML 17-38	A97		38748.2	110.705	36.1298	0.539912	b.d.	0.2996	2.30329	4.234	2.42821	0.1025	0.768782	0.948557	1689.48	34.3234	1680.56	20.1431	1669.45	14.2171	101.2
ML 17-38	A125		154386	104.539	62.6995	0.750156	23.8435	0.3263	3.44012	4.913	11.7989	0.1092	11.2863	0.291563	1820.56	54.7948	1804.5	104.767	1785.99	205.688	101.935
ML 17-38	A80		197497	94.1505	69.2624	0.507774	29.9841	0.3415	4.24516	5.831	16.7301	0.1239	16.1826	0.253743	1893.71	70.0383	1951.06	156.467	2012.47	287.05	94.0988
ML 17-38	A07		65597	114.837	45.379	0.326536	1.73122	0.3739	2.27554	6.651	2.70414	0.129	1.46091	0.841504	2047.78	40.0462	2066.1	24.1535	2084.42	25.7018	98.2423
ML 17-38	A11		42726.4	73.8021	30.6415	0.463761	2.4872	0.3808	2.29388	6.814	3.04089	0.1298	1.99627	0.754345	2079.92	40.9086	2087.59	27.2888	2095.16	35.0778	99.273
ML 17-38	A45		39626.5	65.7306	29.007	0.672451	3.75869	0.3853	2.31202	6.957	3.63143	0.1309	2.80033	0.636671	2101.11	41.5898	2105.98	32.7619	2110.74	49.1202	99.544
ML 17-38	A118		146625	92.7539	68.0609	0.827564	7.7414	0.5292	2.49983	13.93	5.43756	0.1909	4.82886	0.459734	2738.16	56.0119	2745.05	52.867	2750.12	79.3588	99.5654
ML 17-38	A84		22933.4	218.987	18.531	0.184251	5.5939	0.07782	8.48002	0.8889	11.038	0.08284	7.06588	0.768257	483.099	39.5908	645.763	54.1612	1265.47	137.99	38.1754
ML 17-38	A17		28093.5	238.525	25.1415	0.641015	1.64726	0.09379	4.24033	1.114	5.04135	0.08618	2.72669	0.841109	577.904	23.4814	760.314	27.3448	1342.24	52.6766	43.0552
ML 17-38	A86		40645.9	313.852	35.8824	0.25911	4.18574	0.1059	3.28638	1.148	6.0744	0.07863	5.10862	0.541022	648.767	20.3152	776.211	33.5085	1162.72	101.257	55.7972
ML 17-38	A89		19968	187.936	21.0032	0.173861	b.d.	0.1062	2.34352	1.118	2.70464	0.0763	1.35017	0.866483	650.851	14.5245	761.81	14.598	1102.85	26.9987	59.0156
ML 17-38	A27		146135	872.994	111.706	0.100666	5.13534	0.1173	2.43226	1.093	5.63714	0.06761	5.08541	0.431471	714.741	16.4763	749.963	30.3398	856.533	105.601	83.4458
ML 17-38	A60		24435.8	240.582	30.1427	0.149682	0.580885	0.1236	2.41623	1.336	4.55753	0.07838	3.86432	0.530161	751.179	17.1554	861.291	26.8133	1156.41	76.6647	64.9578
ML 17-38	A95		52743.2	514.057	63.4933	0.116964	0.134719	0.1264	2.28374	1.296	6.44648	0.07432	6.0284	0.354261	767.445	16.5446	843.743	37.6304	1050.18	121.5	73.0777
ML 17-38	A63		22490.3	136.049	22.5789	0.554537	0.815114	0.1397	2.96876	1.715	3.67775	0.08905	2.17079	0.807221	842.998	23.5021	1014.31	23.8694	1405.33	41.5728	59.9858
ML 17-38	A26		18339.3	108.343	18.753	0.724332	5.78358	0.1474	4.26067	1.704	7.76873	0.08385	6.49615	0.548438	886.389	35.3816	1010.12	50.9706	1289.16	126.438	68.7573
ML 17-38	A114		44724.9	192.175	35.8161	0.52544	10.0093	0.1507	25.1857	2.984	26.7243	0.1436	8.93696	0.942426	904.779	216.191	1403.62	226.79	2271.56	154.025	39.8307
ML 17-38	A21		27799.4	145.208	26.4858	0.464196	3.7698	0.1653	2.53073	1.996	4.92844	0.08758	4.22906	0.513496	986.062	23.1814	1114.13	33.8985	1373.33	81.3483	71.8006
ML 17-38	A74		30366	174.923	32.2409	0.243165	7.7458	0.1732	2.88967	2.247	9.06963	0.09411	8.59698	0.318609	1029.55	27.5554	1195.87	65.8179	1510.35	162.318	68.1668
ML 17-38	A20		25756.5	127.872	26.4639	0.761958	5.37317	0.1734	2.4423	2.061	6.3723	0.0862	5.8857	0.383268	1030.69	23.3052	1135.81	44.5244	1342.62	113.699	76.7665
ML 17-38	A43		23498.7	143.985	27.7232	0.529532	b.d.	0.174	2.33207	1.971	2.81028	0.08213	1.56815	0.829836	1034.14	22.3204	1105.49	19.1077	1248.7	30.6979	82.817
ML 17-38	A59		54081.5	338.065	64.8963	0.540206	1.41401	0.1745	2.48719	1.928	6.89785	0.08012	6.43383	0.360575	1037.01	23.869	1090.87	47.1999	1200.02	126.833	86.4163
ML 17-38	A23		17290.6	84.8984	17.5884	0.56348	4.73382	0.1841	2.4061	2.25	5.70403	0.08865	5.17171	0.421825	1089.41	24.1623	1196.88	40.9118	1396.51	99.1633	78.0092
ML 17-38	A110		15007.3	74.603	16.2501	0.587635	1.16892	0.1917	2.48065	2.335	3.41238	0.08835	2.34323	0.726956	1130.37	25.7712	1222.91	24.5529	1390.06	44.9693	81.3186
ML 17-38	A82		19957.2	115.407	23.7068	0.443526	b.d.	0.1929	2.33705	2.182	2.71575	0.08202	1.3833	0.860553	1137.09	24.4087	1175.17	19.0863	1245.99	27.0897	91.2602
ML 17-38	A39		188424	202.173	71.4152	0.294027	20.353	0.1944	3.12901	2.911	7.48157	0.1086	6.79581	0.41823	1145.4	32.9201	1384.84	58.1795	1775.89	124.006	64.4971
ML 17-38	A41		42513.4	254.51	51.0819	0.381031	2.59263	0.1949	2.41765	2.217	3.95286	0.0825	3.1273	0.611621	1147.96	25.4731	1186.51	28.0451	1257.49	61.1428	91.2895
ML 17-38	A77		39844.9	196.527	48.5678	1.13451	8.57093	0.1956	2.44471	2.362	9.46071	0.08759	9.13939	0.258407	1151.46	25.8307	1231.14	69.8357	1373.52	175.797	83.8326
ML 17-38	A115		32302.9	156.718	38.5591	1.16991	b.d.	0.1975	2.29168	2.382	2.52847	0.08747	1.06834	0.906352	1161.96	24.4127	1237.21	18.2454	1370.78	20.5574	84.7665
ML 17-38	A123		19231.9	83.5231	19.1344	0.619109	b.d.	0.199	2.34295	2.691	4.65427	0.09807	4.02154	0.503399	1169.96	25.117	1325.99	35.0531	1587.82	75.1581	73.6836
ML 17-38	A25		18029.6	81.4022	18.5259	0.66291	0.199447	0.2032	2.30067	2.371	2.5881	0.08464	1.18539	0.888944	1192.4	25.0942	1233.97	18.6543	1307.35	23.0126	91.207
ML 17-38	A113		39328.4	187.265	47.6391	1.19164	b.d.	0.2042	2.26404	2.516	3.21572	0.08936	2.28363	0.704053	1197.87	24.7972	1276.64	23.638	1411.82	43.6949	84.8457
ML 17-38	A129		54316.7	244.273	65.8794	1.43508	1.09046	0.2051	2.28299	2.384	2.60158	0.08428	1.24746	0.877541	1202.92	25.1012	1237.8	18.7824	1299.05	24.246	92.5996
ML 17-38	A127		64780.5	316.884	78.2039	1.01089	0.132296	0.2057	2.26499	2.381	2.35453	0.08396	0.643145	0.961971	1205.82	24.9577	1236.97	16.978	1291.66	12.5134	93.3544
ML 17-38	A130		34344.2	167.597	41.7475	1.04381	b.d.	0.2083	2.27382	2.416	2.4099	0.08412	0.79833	0.943536	1219.87	25.3209	1247.41	17.4559	1295.27	15.5249	94.1786
ML 17-38	A83		25268.4	122.3	30.0537	0.951826	b.d.	0.209	2.2653	2.426	2.52233	0.0842	1.10931	0.898098	1223.4	25.2921	1250.38	18.3	1297.15	21.5667	94.3145
ML 17-38	A119		37219.9	170.791	42.6117	0.971613	0.337926	0.2095	2.27114	2.47	2.4675	0.08552	0.964629	0.920419	1225.96	25.4057	1263.25	17.9924	1327.33	18.6744	92.3624
ML 17-38	A90		18372.7	87.0676	20.1651	0.633422	b.d.	0.2096	2.28471	2.433	2.51214	0.08417	1.04449	0.909466	1226.82	25.5743	1252.38	18.2403	1296.59	20.3081	94.6193
ML 17-38	A87		33135.1	176.449	42.4124	0.694023	5.84248	0.2098	2.57275	2.544	6.985	0.08798	6.49394	0.368325	1227.53	28.8208	1284.86	52.2356	1382.03	124.764	88.8205
ML 17-38	A129		54316.7	244.208	67.4058	1.43508	1.09046	0.2101	2.30972	2.703	3.64262	0.0933	2.81672	0.634083	1229.46	25.9054	1329.3	27.3639	1494.02	53.2981	82.2919
ML 17-38	A101		19716.2	92.5596	22.0031	0.729958	b.d.	0.2107	2.28823	2.456	2.51256	0.08454	1.03775	0.910719	1232.77	25.7267	1259.33	18.295	1305.01	20.1532	94.4646
ML 17-38	A109		30506.7	136.677	35.714	1.09624	b.d.	0.2115	2.27804	2.467	2.49047	0.08458	1.00646	0.914704	1237	25.6917	1262.36	18.1549	1305.85	19.5431	94.7277
ML 17-38	A98		20701.1	96.6718	23.0394	0.686026	b.d.	0.2127	2.24937	2.524	2.53669	0.08607	1.17266	0.886735	1243.06	25.4807	1278.98	18.6178	1339.86	22.662	92.7754
ML 17-38	A42		23599.2	112.37	26.6062	0.617442	0.725034	0.2128	2.47968	2.456	2.67672	0.0837	1.00796	0.926389	1243.68	28.1082	1259.1	19.5	1285.54	19.6285	96.7439
ML 17-38	A120		20152.3	90.3855	21.9206	0.388946	6.86286	0.213	2.93468	3.541	6.3586	0.1206	5.64087	0.46153	1244.68	33.3034	1536.32	51.6356	1964.63	100.618	63.3547
ML 17-38	A100		24643	115.88	28.6647	0.850264	b.d.	0.2136	2.26688	2.499	2.46754	0.08488	0.974678	0.918681	1247.71	25.7666	1271.82	18.0544	1312.81	18.9075	95.041
ML 17-38	A81		21337	99.223	23.4761	0.616389	b.d.	0.2141	2.36016	2.486	2.5715	0.08423	1.02092	0.917813	1250.41	26.8819	1267.97	18.7934	1297.87	19.8462	96.3437
ML 17-38	A76		26340.1	125.649	30.0284	0.676605	b.d.	0.2144	2.25997	2.505	2.56044	0.08474	1.20348	0.882651	1252.13	25.7706	1273.44	18.7526	1309.6	23.3564	95.6111
ML 17-38	A85		27484.2	127.686	33.7897	1.0945	b.d.	0.2149	2.6078	2.496	2.77827	0.0842	0.958205	0.938642	1255.13	29.8108	1270.75	20.3423	1297.28	18.6286	96.7512
ML 17-38	A31		38575.6	166.049	40.1202	0.722454	0.0358648	0.2171	2.2578	2.573	2.40984	0.08596	0.842414	0.936909	1266.37	26.0113	1292.91	17.7749	1337.27	16.2858	94.6983
ML 17-38	A48		22724	103.161	27.238	1.1023	b.d.	0.2173	2.26986	2.534	2.45524	0.08456	0.935922	0.924495	1267.81	26.1774	1281.89	18.0352	1305.57	18.1741	97.1074
ML 17-38	A12		20326.7	90.7387	22.3844	0.686868	b.d.	0.221	2.27025	2.607	2.44989	0.08557	0.92082	0.926676	1287.05	26.5417	1302.63	18.1404	1328.39	17.8237	96.8877
ML 17-38	A75		28366.8	120.634	31.7417	0.946217	2.98299	0.2219	2.34247	2.8	4.11022	0.09151	3.37739	0.569913	1292.11	27.4853	1355.63	31.2281	1457.29	64.2239	88.6648
ML 17-38	A53		16616	71.9445	17.8755	0.634849	b.d.	0.2227	2.33582	2.71	2.7893	0.08827	1.52452	0.837421	1295.98	27.4815	1331.2	20.9018	1388.31	29.2643	93.3495
ML 17-38	A66		12404.8	46.3765	12.0089	0.572041	7.00775	0.2268	2.43014	3.268	8.32251	0.1045	7.95981	0.291996	1317.48	29.022	1473.44	66.8587	1705.92	146.522	77.2299
ML 17-38	A116		17462.8	82.2262	21.0139	0.656056	0.508352	0.2304	2.36207	2.844	2.80854	0.08954	1.51938	0.841032	1336.45	28.5737	1367.24	21.3212	1415.69	29.0563	94.4024
ML 17-38	A108		19937.6	92.7405	24.4095	0.792359	b.d.	0.2325	2.28431	2.723	2.52177	0.08495	1.0683	0.905835	1347.52	27.8372	1334.81	18.9032	1314.5	20.7187	102.512
ML 17-38	A47		34812.7	151.354	40.672	0.865756	b.d.	0.2335	2.33102	2.725	2.47692	0.08465	0.83753	0.941098	1352.56	28.5035	1335.23	18.5668	1307.56	16.259	103.442
ML 17-38	A79		20852.2	105.277	27.1938	0.605822	b.d.	0.2389	2.26501	2.772	2.46823	0.08415	0.980759	0.917666	1381.11	28.2199	1348.11	18.5874	1296.12	19.0702	106.557
ML 17-38	A122		42144.5	168.265	47.3451	0.534234	10.9275	0.245	2.64071	3.944	10.6036	0.1167	10.2695	0.24904	1412.62	33.5862	1622.66	89.7388	1906.91	184.433	74.0789
ML 17-38	A13		77084.2	199.489	61.8438	0.562468	10.6222	0.2498	3.1306	4.676	12.2241	0.1358	11.8164	0.256101	1437.36	40.461	1763.04	107.778	2174.12	205.815	66.1122
ML 17-38	A24		74134.8	191.497	51.5936	0.248086	2.23339	0.2615	2.48469	3.599	3.10216	0.09984	1.85734	0.800955	1497.39	33.2863	1549.4	24.9545	1621.07	34.562	92.3709
ML 17-38	A08		28797.5	80.0119	24.4639	0.595597	4.28507	0.2687	2.72819	3.885	4.77589	0.1048	3.91996	0.571243	1534.44	37.3612	1610.56	39.318	1711.57	72.1059	89.6511
ML 17-38	A40		99803.7	170.834	66.824	1.0108	11.7429	0.2759	2.55018	4.324	8.36316	0.1137	7.96486	0.304931	1570.83	35.6501	1697.95	71.4221	1858.65	143.874	84.5146
ML 17-38	A32		29885.7	78.5167	25.5337	0.515378	0.211004	0.2961	2.27668	4.311	2.49882	0.1056	1.02996	0.911104	1672.17	33.6206	1695.51	20.8072	1724.49	18.9148	96.966
ML 17-38	A124		195317	78.4889	61.268	0.264622	35.4607	0.3069	4.46649	8.041	10.5512	0.19	9.55914	0.423318	1725.45	67.972	2235.65	100.057	2742.39	157.21	62.9176
ML 17-38	A29		83301.9	168.292	64.794	0.681886	3.92534	0.3354	2.29686	5.594	3.85202	0.121	3.09232	0.596275	1864.53	37.2964	1915.14	33.7352	1970.39	55.1213	94.6274
ML 17-38	A96		38319.9	74.1749	28.9325	0.498276	0.512751	0.3531	2.27151	6.245	2.45809	0.1283	0.939386	0.924096	1949.15	38.3219	2010.74	21.7451	2074.61	16.545	93.953
ML 17-38	A126		38269.9	68.6476	29.0851	0.802481	4.11734	0.3603	2.3259	6.405	3.85549	0.129	3.07489	0.603271	1983.37	39.8325	2033.02	34.4391	2083.79	54.1003	95.1807
ML 17-38	A55		162007	151.235	116.612	0.878589	16.3999	0.5121	3.233	18.66	17.1034	0.2642	16.7951	0.189026	2665.72	70.9747	3024.24	179.86	3272.01	264.067	81.4703
ML 17-38	A54		380928	159.764	184.793	0.789235	26.0696	0.6889	4.06555	16.37	15.8276	0.1724	15.2965	0.256865	3378.38	107.798	2898.78	164.022	2580.76	255.447	130.906
RZ17-8 (Metasediment)
RZ 17-8	A327		48501.5	364.204	59.6228	1.17407	0.918865	0.1439	3.71238	1.414	3.94277	0.07124	1.32805	0.941565	866.717	30.1771	894.682	23.7224	964.429	27.1178	89.8684
RZ 17-8	A316		54820.2	655.341	90.4415	0.303967	0.288066	0.1443	2.76207	1.415	3.08625	0.07113	1.37692	0.89496	868.89	22.4915	895.327	18.5301	961.178	28.1297	90.3985
RZ 17-8	A315		86770.1	835.478	119.817	0.281425	0.445358	0.1492	2.97887	1.416	5.0359	0.06884	4.06036	0.591528	896.599	24.9827	895.839	30.4236	893.963	83.8207	100.295
RZ 17-8	A307		40344.4	343.279	52.4187	0.682696	0.788494	0.1519	2.60093	1.502	3.81412	0.0717	2.78974	0.681922	911.797	22.1524	931.206	23.5196	977.435	56.8508	93.2847
RZ 17-8	A294		29174.8	206.052	36.2218	0.491258	0.372352	0.1607	2.94971	1.632	3.19371	0.07366	1.22433	0.9236	960.405	26.3738	982.487	20.3076	1032.16	24.7431	93.0478
RZ 17-8	A281		34186.6	266.683	47.2387	0.368432	b.d.	0.1717	2.40522	1.805	2.79439	0.07626	1.4225	0.860733	1021.2	22.7556	1047.27	18.4244	1102.03	28.4485	92.6654
RZ 17-8	A304		32687.4	244.989	49.2598	0.634081	0.413555	0.1825	2.50312	2.001	2.73101	0.07955	1.09214	0.916557	1080.35	24.9461	1115.93	18.661	1185.91	21.574	91.0982
RZ 17-8	A302		16761.9	95.5699	21.0709	0.934697	0.586288	0.1851	3.58334	1.932	24.7132	0.0757	24.452	0.144997	1094.84	36.1825	1092.29	180.485	1087.21	490.095	100.702
RZ 17-8	A274		22687.9	125.322	27.3604	0.833096	b.d.	0.1925	2.35281	2.196	2.98695	0.08274	1.84016	0.787695	1134.83	24.5289	1179.78	21.0562	1263.18	35.9483	89.8393
RZ 17-8	A299		19670.2	114.969	26.0421	0.830418	0.504796	0.1957	2.61629	2.172	15.1344	0.08048	14.9065	0.172871	1152.25	27.6648	1172.05	111.083	1208.81	293.486	95.321
RZ 17-8	A305		28285.9	195.447	40.6849	0.448378	b.d.	0.1996	2.40543	2.223	2.70385	0.08079	1.23478	0.889634	1173.07	25.8507	1188.39	19.1156	1216.36	24.2844	96.4409
RZ 17-8	A261		32656.1	189.609	44.8743	0.965483	b.d.	0.2013	2.28385	2.305	2.42899	0.08306	0.827079	0.940244	1182.07	24.7134	1213.8	17.3482	1270.67	16.1401	93.0271
RZ 17-8	A257		39332.6	214.556	50.6289	0.841059	b.d.	0.2031	2.52551	2.385	2.7034	0.08514	0.964446	0.934199	1192.08	27.5453	1237.99	19.5262	1318.82	18.6932	90.3904
RZ 17-8	A290		40325.9	211.785	54.707	1.30454	b.d.	0.2041	2.31795	2.395	2.50672	0.0851	0.95435	0.924692	1197.45	25.3806	1241.16	18.1168	1317.86	18.5	90.8627
RZ 17-8	A293		23746.2	114.075	27.0383	0.802461	4.91117	0.2051	2.31272	2.395	5.90601	0.08469	5.43436	0.391587	1202.73	25.4251	1241.17	43.2125	1308.53	105.483	91.9147
RZ 17-8	A335		96827.2	426.106	120.515	1.5101	1.40301	0.2073	2.35672	2.428	3.68105	0.08495	2.82772	0.640231	1214.56	26.1418	1251.01	26.8256	1314.32	54.8424	92.4099
RZ 17-8	A333		27082.2	131.646	32.9088	0.988799	b.d.	0.2088	2.29826	2.435	2.48863	0.08459	0.954628	0.923501	1222.32	25.6403	1253.04	18.0729	1306.21	18.5357	93.5775
RZ 17-8	A262		30858.6	151.016	38.6356	1.11934	b.d.	0.2097	2.30276	2.447	2.51564	0.0846	1.01279	0.915377	1227.41	25.788	1256.41	18.296	1306.43	19.6644	93.9515
RZ 17-8	A279		12344.7	54.8684	12.8896	0.582793	0.833411	0.2101	2.69671	2.478	3.62971	0.08554	2.42952	0.742954	1229.13	30.2487	1265.5	26.6029	1327.86	47.03	92.5652
RZ 17-8	A277		16258.5	78.7142	18.3931	0.677944	b.d.	0.2104	2.31057	2.484	2.67518	0.08562	1.34829	0.863704	1230.87	25.942	1267.25	19.5528	1329.52	26.0938	92.5802
RZ 17-8	A297		26261.4	127.548	30.6231	0.770967	b.d.	0.2109	2.33519	2.473	2.52042	0.08503	0.948355	0.92651	1233.61	26.2721	1264.08	18.3879	1316.3	18.3878	93.7181
RZ 17-8	A267		18241.3	87.8937	22.096	1.01707	0.457544	0.2114	2.31514	2.465	2.62674	0.08457	1.24092	0.881374	1236.41	26.0996	1261.96	19.1546	1305.79	24.096	94.6862
RZ 17-8	A292		18884.8	95.0842	22.8764	0.747367	b.d.	0.215	2.31654	2.477	2.59976	0.08358	1.17999	0.891059	1255.24	26.4765	1265.42	18.9824	1282.76	22.9876	97.8545
RZ 17-8	A314		37800.2	207.576	52.5606	1.03043	b.d.	0.2154	2.46673	2.541	2.64305	0.08558	0.949206	0.933287	1257.35	28.2397	1283.95	19.4438	1328.74	18.3722	94.6271
RZ 17-8	A326		44106.9	205.464	55.313	1.18235	b.d.	0.2164	2.27956	2.536	2.4107	0.08497	0.784266	0.945602	1263.08	26.2007	1282.37	17.7085	1314.83	15.2094	96.0644
RZ 17-8	A272		26524.6	127.31	34.5832	1.23274	b.d.	0.2182	2.71333	2.669	2.89492	0.0887	1.00916	0.937273	1272.57	31.411	1319.92	21.6114	1397.66	19.3467	91.0502
RZ 17-8	A265		36472	196.505	48.1663	0.765792	b.d.	0.22	2.82822	2.514	9.7207	0.08286	9.30017	0.290948	1282.08	32.9661	1276.05	73.1883	1265.89	181.613	101.279
RZ 17-8	A276		30346.3	139.752	34.9264	0.644037	b.d.	0.2273	2.55849	2.732	6.43456	0.08718	5.90404	0.397618	1320.1	30.6135	1337.15	48.9908	1364.55	113.706	96.7421
RZ 17-8	A313		31774.2	98.5121	29.1721	1.01972	3.98017	0.2281	2.34534	2.913	4.49197	0.09261	3.83108	0.522118	1324.69	28.1456	1385.28	34.5351	1479.9	72.6296	89.5125
RZ 17-8	A324		25217.8	301.228	70.9476	2.99116	0.413864	0.2334	3.93223	2.748	4.21149	0.08542	1.50804	0.933692	1352.08	48.1409	1341.66	31.8488	1325.08	29.2037	102.038
RZ 17-8	A295		4894.6	48.4916	3.57483	0.848988	9.02479	0.05285	2.72089	0.448	5.91264	0.06148	5.24938	0.460183	331.997	8.81064	375.9	18.7476	656.197	112.595	50.5941
RZ 17-8	A308		18557.1	294.345	25.1584	0.181766	0.623476	0.08983	2.3695	0.7616	2.96176	0.06149	1.77693	0.800033	554.537	12.6028	574.946	13.0859	656.464	38.1118	84.4733
RZ 17-8	A306		21902.1	211.466	21.747	0.508356	1.30612	0.1015	2.62163	0.9396	7.9026	0.06713	7.45508	0.331743	623.272	15.5937	672.665	39.6347	841.786	155.169	74.0416
RZ 17-8	A318		20002.9	157.125	19.9154	0.373714	0.178356	0.116	2.44054	1.286	2.72397	0.08043	1.20986	0.895951	707.424	16.3721	839.632	15.6813	1207.53	23.8246	58.5841
RZ 17-8	A309		78432.9	689.872	79.7706	0.330777	0.175949	0.1196	3.66413	1.212	4.23846	0.07347	2.13042	0.864496	728.447	25.288	806.026	23.8571	1026.84	43.0892	70.9407
RZ 17-8	A319		32009.2	218.716	32.2445	0.69335	0.0492871	0.1285	3.07812	1.46	3.36414	0.08243	1.35742	0.914981	779.115	22.6292	914.057	20.479	1255.79	26.5457	62.0417
RZ 17-8	A300		30148.4	300.396	40.0402	0.367808	0.0793609	0.1313	2.85537	1.33	7.99754	0.07344	7.47045	0.357031	795.451	21.4031	858.792	47.4417	1026.06	151.113	77.525
RZ 17-8	A312		69931.4	600.919	78.3253	0.204403	1.91104	0.1324	2.71487	1.286	4.01118	0.07049	2.95281	0.676824	801.278	20.4885	839.652	23.177	942.545	60.498	85.0121
RZ 17-8	A310		22944.3	180.079	26.7182	0.460591	3.03332	0.136	2.41148	1.556	4.2487	0.08298	3.49803	0.56758	822.23	18.6424	953.039	26.6108	1268.66	68.2823	64.8109
RZ 17-8	A266		20118.8	132.367	21.5624	0.751736	b.d.	0.1365	3.01651	1.572	3.21785	0.0835	1.12036	0.937431	824.873	23.3987	959.065	20.167	1280.97	21.8314	64.3946
RZ 17-8	A259		35530.9	317.929	51.7704	0.899112	b.d.	0.1526	2.60948	1.87078	6.86164	0.0889	6.34608	0.3803	915.62	22.3122	1070.81	46.449	1402.08	121.588	65.3046
RZ 17-8	A256		24912.5	179.61	30.2101	0.533405	b.d.	0.1565	2.42548	1.729	2.68712	0.08008	1.15658	0.90263	937.568	21.199	1019.2	17.4336	1198.96	22.8038	78.1985
RZ 17-8	A303		37249	295.245	47.5055	0.30454	b.d.	0.1577	2.44425	1.789	6.73877	0.08229	6.27987	0.362714	944.031	21.5003	1041.61	44.8714	1252.46	122.868	75.3743
RZ 17-8	A303		37249	295.162	47.3413	0.30454	b.d.	0.1582	2.35675	1.638	2.55684	0.07507	0.991561	0.921741	946.888	20.7877	984.853	16.2488	1070.46	19.9238	88.4563
RZ 17-8	A311		9504.21	32.5007	6.59437	0.589684	11.9577	0.1584	3.78853	1.872	7.20312	0.08574	6.12633	0.525957	947.636	33.4741	1071.27	48.8291	1332.35	118.517	71.1252
RZ 17-8	A298		29564.6	198.802	34.3806	0.443975	b.d.	0.1603	2.30712	1.705	2.65214	0.07714	1.30806	0.86991	958.285	20.5768	1010.25	17.1159	1124.72	26.072	85.2019
RZ 17-8	A280		37065.7	225.407	40.0318	0.60021	b.d.	0.1647	2.42808	1.761	2.71156	0.07758	1.20706	0.895454	982.624	22.1675	1031.35	17.7157	1136.19	24.0183	86.4841
RZ 17-8	A258		22130.3	141.928	27.8517	0.542975	0.889633	0.1786	2.29474	1.99	3.13686	0.08087	2.1387	0.731542	1059.18	22.4528	1112.49	21.427	1218.22	42.0505	86.9451
RZ 17-8	A273		26927.6	196.927	37.0995	0.308803	1.41275	0.1819	2.43446	2.184	3.15189	0.08706	2.00195	0.772383	1077.55	24.2027	1175.92	22.1928	1361.78	38.5703	79.1278
RZ 17-8	A296		85862.3	124.668	39.9033	0.668403	15.4515	0.1851	11.451	2.543	12.8713	0.09962	5.87749	0.889653	1094.94	116.355	1284.39	98.4233	1616.97	109.428	67.7156
RZ 17-8	A255		46610	280.906	58.2368	0.541756	1.29402	0.1898	2.46973	2.28	3.51739	0.08711	2.5045	0.702146	1120.44	25.4507	1206.1	25.1347	1362.92	48.2451	82.2092
RZ 17-8	A264		21333.6	120.891	27.8456	1.01333	b.d.	0.1922	2.29162	2.213	2.53835	0.08352	1.09164	0.9028	1133.14	23.8571	1185.17	17.9093	1281.41	21.2705	88.4285
RZ 17-8	A317		49170.4	246.033	65.3334	1.67914	b.d.	0.1938	2.29846	2.269	2.42049	0.0849	0.758838	0.949586	1142.19	24.1035	1202.73	17.2041	1313.16	14.7197	86.98
RZ 17-8	A291		18570.2	94.3957	20.8151	0.698948	b.d.	0.1939	2.56456	2.331	2.94799	0.08722	1.45384	0.869936	1142.32	26.9027	1221.91	21.1673	1365.3	27.9967	83.6679
RZ 17-8	A260		30707	149.076	34.0042	0.782231	b.d.	0.1944	2.40477	2.259	2.59549	0.0843	0.976539	0.92652	1145.01	25.2775	1199.63	18.4342	1299.39	18.9794	88.1186
RZ 17-8	A270		41450.2	204.065	47.7266	1.04132	b.d.	0.195	2.45519	2.264	2.63766	0.08417	0.963995	0.930821	1148.66	25.8838	1201	18.7478	1296.42	18.7435	88.602
RZ 17-8	A263		27641.8	96.9672	23.4058	0.765989	4.09479	0.1993	3.0182	1.984	23.229	0.07218	23.0321	0.129932	1171.57	32.4146	1109.95	170.331	991.153	468.376	118.203
RZ 17-8	A320		32615.1	151.592	34.8227	0.617687	4.45263	0.1999	2.54009	2.77	10.8462	0.1005	10.5445	0.234193	1174.58	27.333	1347.51	84.3251	1633.76	195.895	71.8942
RZ 17-8	A275		25861.2	125.775	31.9565	0.989213	0.751063	0.2121	2.2837	2.594	2.94872	0.0887	1.86539	0.774471	1240.05	25.8134	1298.94	21.8432	1397.6	35.7619	88.727
RZ 17-8	A323		30167.3	113.953	28.8587	0.72202	3.33715	0.2121	2.30585	3.193	4.82134	0.1092	4.23419	0.47826	1239.9	26.0615	1455.5	37.9816	1786.06	77.1659	69.4208
RZ 17-8	A278		39501	69.6284	21.2739	0.469946	14.4617	0.2157	5.16979	2.938	19.0796	0.0988	18.3659	0.270959	1259.15	59.4054	1391.88	155.924	1601.58	342.623	78.6194
